# Supplementary material for: COHCAP: an integrative genomic pipeline for single-nucleotide resolution DNA methylation analysis
Source: Oxford University Press journal article supplement (doi:10.1093/nar/gkt242), 2013-04-17
Supplement: gkt242_supplementary_data.zip [file gkt242_supplementary_data.zip]

## Supplemental Methods

### *COHCAP – 1 Group Workflows*

*Average by CpG Site (recommended)*: Table of beta values is annotated using annotation file and sample description file. Values with detection p-value greater than cutoff are censored. Histogram, dendrogram, and principal component analysis (PCA) plot are created based upon beta values for samples listed in sample description file. Beta values are averaged among all samples within a group for a given CpG site, and methylated and unmethylated thresholds are used to identify CpG sites that are methylated or unmethylated, and ambiguous CpG sites are removed. CpG sites with ambiguous average beta values are filtered out. CpG islands (as defined by the annotation file, which also defines the mapping between CpG islands and genes) are considered for statistical analysis if they possess a minimum number of filtered CpG sites (default = 4). CpG island p-values are calculated by Fisher's Exact test comparing methylated and unmethylated CpG site counts within a CpG island genome-wide methylated and unmethylated CpG site counts. False discovery rate (FDR) values are then calculated using the method of Benjamini and Hochberg [45]. Integration with gene expression data is not possible with this workflow.

*Average by CpG Island*: Table of beta values is annotated using annotation file and sample description file. Values with detection p-value greater than cutoff are censored. Histogram, dendrogram, and principal component analysis (PCA) plot are created based upon beta values for samples listed in sample description file. Beta values are averaged among all CpG sites within a group, and methylated and unmethylated thresholds are used to identify CpG sites that are methylated or unmethylated, and ambiguous CpG sites are removed. CpG sites with ambiguous average beta values are filtered out. Finally, beta values are averaged among CpG sites within a CpG islands. DNA methylation and gene expression data (represented by a table of expression / intensity values) are integrated by calculating correlations for paired samples.

### *COHCAP – 2 Group Workflows*

Average by CpG Site: Table of beta values is annotated using annotation file and sample description file. Values with detection p-value greater than cutoff are censored. Histogram, dendrogram, and principal component analysis (PCA) plot are created based upon beta values for samples listed in sample description file. If samples are paired, then CpG site p-values are calculated via ANOVA F-statistic. Otherwise, CpG site p-values are calculated via t-test. False discovery rate (FDR) values then calculated using the method of Benjamini and Hochberg [45]. Beta values are then averaged among all samples within a group for a given CpG site. CpG sites are then filtered based upon average beta values (above methylation cutoff in one group and below methylation cutoff in the other group), p-value, and FDR. CpG islands (as defined by the annotation file, which also defines the mapping between CpG islands and genes) are considered for statistical analysis if they possess a minimum number of filtered CpG sites (default = 4). CpG site p-values are calculated via ANOVA F-statistic for averaged beta values (using a 2-way ANOVA considering the influence of group and CpG site pairs on beta value variation). FDR values then calculated using the method of Benjamini and Hochberg [45]. DNA methylation and gene expression data (represented by a table containing fold-change, p-value, and FDR values) are integrated by filtering for islands / genes meeting various criteria (e.g. methylated threshold, unmethylated threshold, CpG island p-value, CpG island FDR, expression fold-change, expression p-value, and/or expression FDR), and then listing genes with an inverse relationship between change in DNA methylation and change in gene expression).

Average by CpG Island (recommended): Table of beta values is annotated using annotation file and sample description file. Values with detection p-value greater than cutoff are censored. Histogram, dendrogram, and principal component analysis (PCA) plot are created based upon beta values for samples listed in sample description file. If samples are paired, then CpG site p-values are calculated via ANOVA F-statistic. Otherwise, CpG site p-values are calculated via t-test. False discovery rate (FDR) values then calculated using the method of Benjamini and Hochberg [45]. CpG sites are then filtered based upon average beta values (above methylation cutoff in one group and below methylation cutoff in the other group), p-value, and FDR. If a CpG islands (as defined by the annotation file, which also defines the mapping between CpG islands and genes) contains a minimum number of filtered CpG sites

(default = 4), then average beta values are calculated between filtered CpG sites in each CpG island (per sample). CpG island beta values are then treated like CpG site beta values for statistical analysis. DNA methylation and gene expression data (represented by a table of expression / intensity values) are integrated by calculating correlations for paired samples.

### *COHCAP – 3+ Group Workflows*

*Average by CpG Site:* Table of beta values is annotated using annotation file and sample description file. Values with detection p-value greater than cutoff are censored. Histogram, dendrogram, and principal component analysis (PCA) plot are created based upon beta values for samples listed in sample description file. CpG site p-values are calculated via ANOVA F-statistic (if samples are paired, 2-way ANOVA is used; otherwise, 1-way ANOVA is used). False discovery rate (FDR) values then calculated using the method of Benjamini and Hochberg [45]. CpG sites are then filtered based upon p-value and FDR, and beta values are then averaged among all samples within a group for a given CpG site. CpG islands (as defined by the annotation file, which also defines the mapping between CpG islands and genes) are considered for statistical analysis if they possess a minimum number of filtered CpG sites (default = 4). CpG site p-values are calculated via ANOVA F-statistic for averaged beta values (using a 2-way ANOVA considering the influence of group and CpG site pairs on beta value variation). FDR values then calculated using the method of Benjamini and Hochberg [45]. Integration with gene expression data is not possible with this workflow.

*Average by CpG Island (recommended):* Table of beta values is annotated using annotation file and sample description file. Values with detection p-value greater than cutoff are censored. Histogram, dendrogram, and principal component analysis (PCA) plot are created based upon beta values for samples listed in sample description file. CpG site p-values are calculated via ANOVA F-statistic (if samples are paired, 2-way ANOVA is used; otherwise, 1-way ANOVA is used). False discovery rate (FDR) values then calculated using the method of Benjamini and Hochberg [45]. CpG sites are then filtered based upon p-value and FDR. If a CpG islands (as defined by the annotation file, which also defines the mapping between CpG islands and genes) contains a minimum number of filtered CpG sites

(default = 4), then average beta values are calculated between filtered CpG sites in each CpG island (per sample). CpG island beta values are then treated like CpG site beta values for statistical analysis. DNA methylation and gene expression data (represented by a table of expression / intensity values) are integrated by calculating correlations for paired samples.

### *Sample Processing*

When raw Illumina 450k methylation data was available, the data was normalized in Illumina® Genome Studio™ (V2011.1) using a background correction normalized to Illumina controls (without providing any grouping information – each sample was identified as a separate group for normalization purposes). Processed beta values for publicly available data [10] were used for COHCAP analysis..

Processed RPKM (Reads Per Kilobase per Million) expression levels were used for the TCGA RNA-Seq data. Sample TCGA-BH-A0AW-01A was removed from the ER+ vs. ER- analysis because it showed a high proportion of probes with detection p-value < 0.05. This sample was not present in the paired cancer vs. normal analysis. All other samples had >99% of probes with a detection p-value < 0.05. This processed RNA-Seq data was used in COHCAP for the “Average by Island” workflow. Partek® Genomics Suite™ (Version 6.6; Partek, Inc., St. Louis, MO) was used for calculating fold-change, p-value, and FDR values for the “Average by Site” COHCAP workflow (for the TCGA data as well as the HCT116 data published with this study). The Human Gene 1.0 ST Array used to measure parental and mutant gene expression in this study was processed via RMA normalization [56]. When performing integration via overlap, a gene was defined as differentially expressed if it showed at least at 1.5 fold-change and an FDR less than 0.05. Fold-change values are calculated based upon the least-squares mean, p-values were calculated using 1-way ANOVA with appropriate linear contrast, and FDR values were calculated using the method of Benjamini and Hochberg [45].

Raw BS-Seq data [36] was aligned using Bismark [43], and sites with at least 10x coverage were included in the .bed files used in for COHCAP analysis.

The novel methylation and gene expression data presented in this study can be downloaded from GEO (GEO SuperSeries GSE42310; expression in GSE42307, HCT116 methylation in GSE42308, HES-2 450k methylation in GSE42707, and HES-2 MIRA methylation in GSE42734).

#### *HCT116 Dataset and Validation of Differential Methylation*

Gene expression analysis was performed using RNA extracted with the RNeasy kit (Qiagen) from HCT116 human colon cancer cell lines. The microarray sample preparation was carried out using Ambion's WT Expression kit (Life Technologies, Carlsbad, CA) and Affymetrix's GeneChip Terminal labeling system at the COH Functional Genomics Core using a procedure described previously [57]. Briefly, 100 ng of total RNA was used to start the first strand cDNA synthesis using random primers plus polyT7 promoter. The RNA quality was checked using Agilent Bioanalyzer nano 6000 and all RNA had a RIN > 9 for this study before the 1<sup>st</sup> strand synthesis. After the 2<sup>nd</sup> strand cDNA synthesis, the antisense cRNA was carried using T7 RNA polymerase. Then, 10 µg of cRNA was used to start the 2nd cycle of cDNA synthesis using random primers plus dUTP and dNTP mix. The single-strand cDNA was fragmented and then end-labeled with biotinylated nucleotides in the presence of terminal deoxynucleotidyl transferase (TdT) using Affymetrix WT Terminal Labeling kit. Five µg of labeled single stranded cDNA was hybridized with Affymetrix Human Gene 1.0 ST arrays the arrays were scanned using Affymetrix GeneChip Scanner 3000 7G.

Genomic DNA was prepared from HCT116 human colon cancer cell lines using the DNeasy® Tissue kit following manufacturer's instructions (Qiagen). DNA was extracted from HCT116 human colon cancer cell lines using Qiagen kit. Illumina MethyHuman450k beadchip methylation analysis was performed following Illumina Infinium HD methylation assay protocol at the COH Functional Genomics Core. Briefly, 500 ng high quality genomic DNA of each sample was treated with Zymo EZ DNA methylation kit (Zymo Research) to convert unmethylated cytosines to uracil, while leaving methylated cytosines unchanged for methylation analysis. The bisulfate-converted DNA was denatured with 0.1 N NaOH and amplified at 37°C for 20-24 hours. After fragmentation, the amplified DNA was precipitated with 2-propanol. The DNA was resuspended in 46 µl RA1 buffer and 15 µl resuspended DNA was loaded

into each beadchip section. The beadchip was assembled into the Hyb chamber and incubated in a 48°C degree in Illumina hybridization oven for at least 16 hours. After washing, the beadchip was assembled into a flow-through chamber and single base extension and staining was performed at 44°C on the chamber rack. After washing, the stained beadchip was coated with XC4 buffer and scanned using Illumina's HiScanSQ scanner.

Validation of gene expression levels was determined by real-time RT-PCR. Briefly, total RNA was reverse transcribed to cDNA using iScript cDNA Synthesis Kit (Bio-Rad), and real-time RT-PCR reactions were performed using iQ SYBR Green supermix (Bio-Rad) on a DNA Engine thermal cycler equipped with Chromo4 detector (Bio-Rad). Gene specific primer sets were purchased from RealTimePrimers.

EpiTect® MethylPCR assay (Qiagen) was performed to validate DNA methylation levels. Unmethylated or methylated DNA was selectively digested by methylation-sensitive (cuts unmethylated and partially methylated DNA, leaving only hypomethylated DNA) and methylation-dependent restriction enzymes (cuts any methylated DNA, leaving only unmethylated DNA) according to the manufacturer's instructions. The remaining DNA after digestion was quantified by real-time PCR using primers detecting methylation status of the CpG islands associated with the individual gene. The relative concentrations of differentially methylated DNA were determined by comparing the amount of each digest with that of mock digest (no enzyme added), using the software provided by the manufacturer (Qiagen). In all cases, validation was performed in triplicate.

#### *MIRA Analysis Comparison*

HES-2 cell line DNA was prepared as described in Tompkins et al. [58], and the microarray sample was processed at the UCLA DNA Microarray Core. The data for the MIRA sample (GSE42734) was processed using NimbleScan (v 2.6.0.0) to compute ratio files and find peaks (sliding window width = 750 bp, minimum  $-\log_{10}$  p-value cutoff = 2.0, maximum spacing between nearby probes within peak = 500 bp, minimum probes per peak = 2). The NimbleGen MeDIP array (Human DNA Methylation 3 x 720K CpG Island Plus RefSeq Promoter Array) used for the MIRA assay defined genome coordinates based

upon hg18 (while the UCSC CpG islands are defined based upon hg19 coordinates), so the MIRA peaks were converted to hg19 coordinates (with a minimum re-mapping ratio of 0.95 without multiple output regions) using the lift-over function in Galaxy [59-61]. Likewise, the probe annotation file was converted to hg19 coordinates in the same way. Finally, peaks were annotated with UCSC CpG Islands showing at least 50% overlap (with either the peak or the island, including the 2 kb flanking region for the CpG island shores). The same DNA sample was used for the Illumina 450k array (GSE42707), which was processed in the same way as the HCT116 sample at the COH Functional Genomics Core.

**Figure S1: Overview of COHCAP “Average by Site” Workflow**

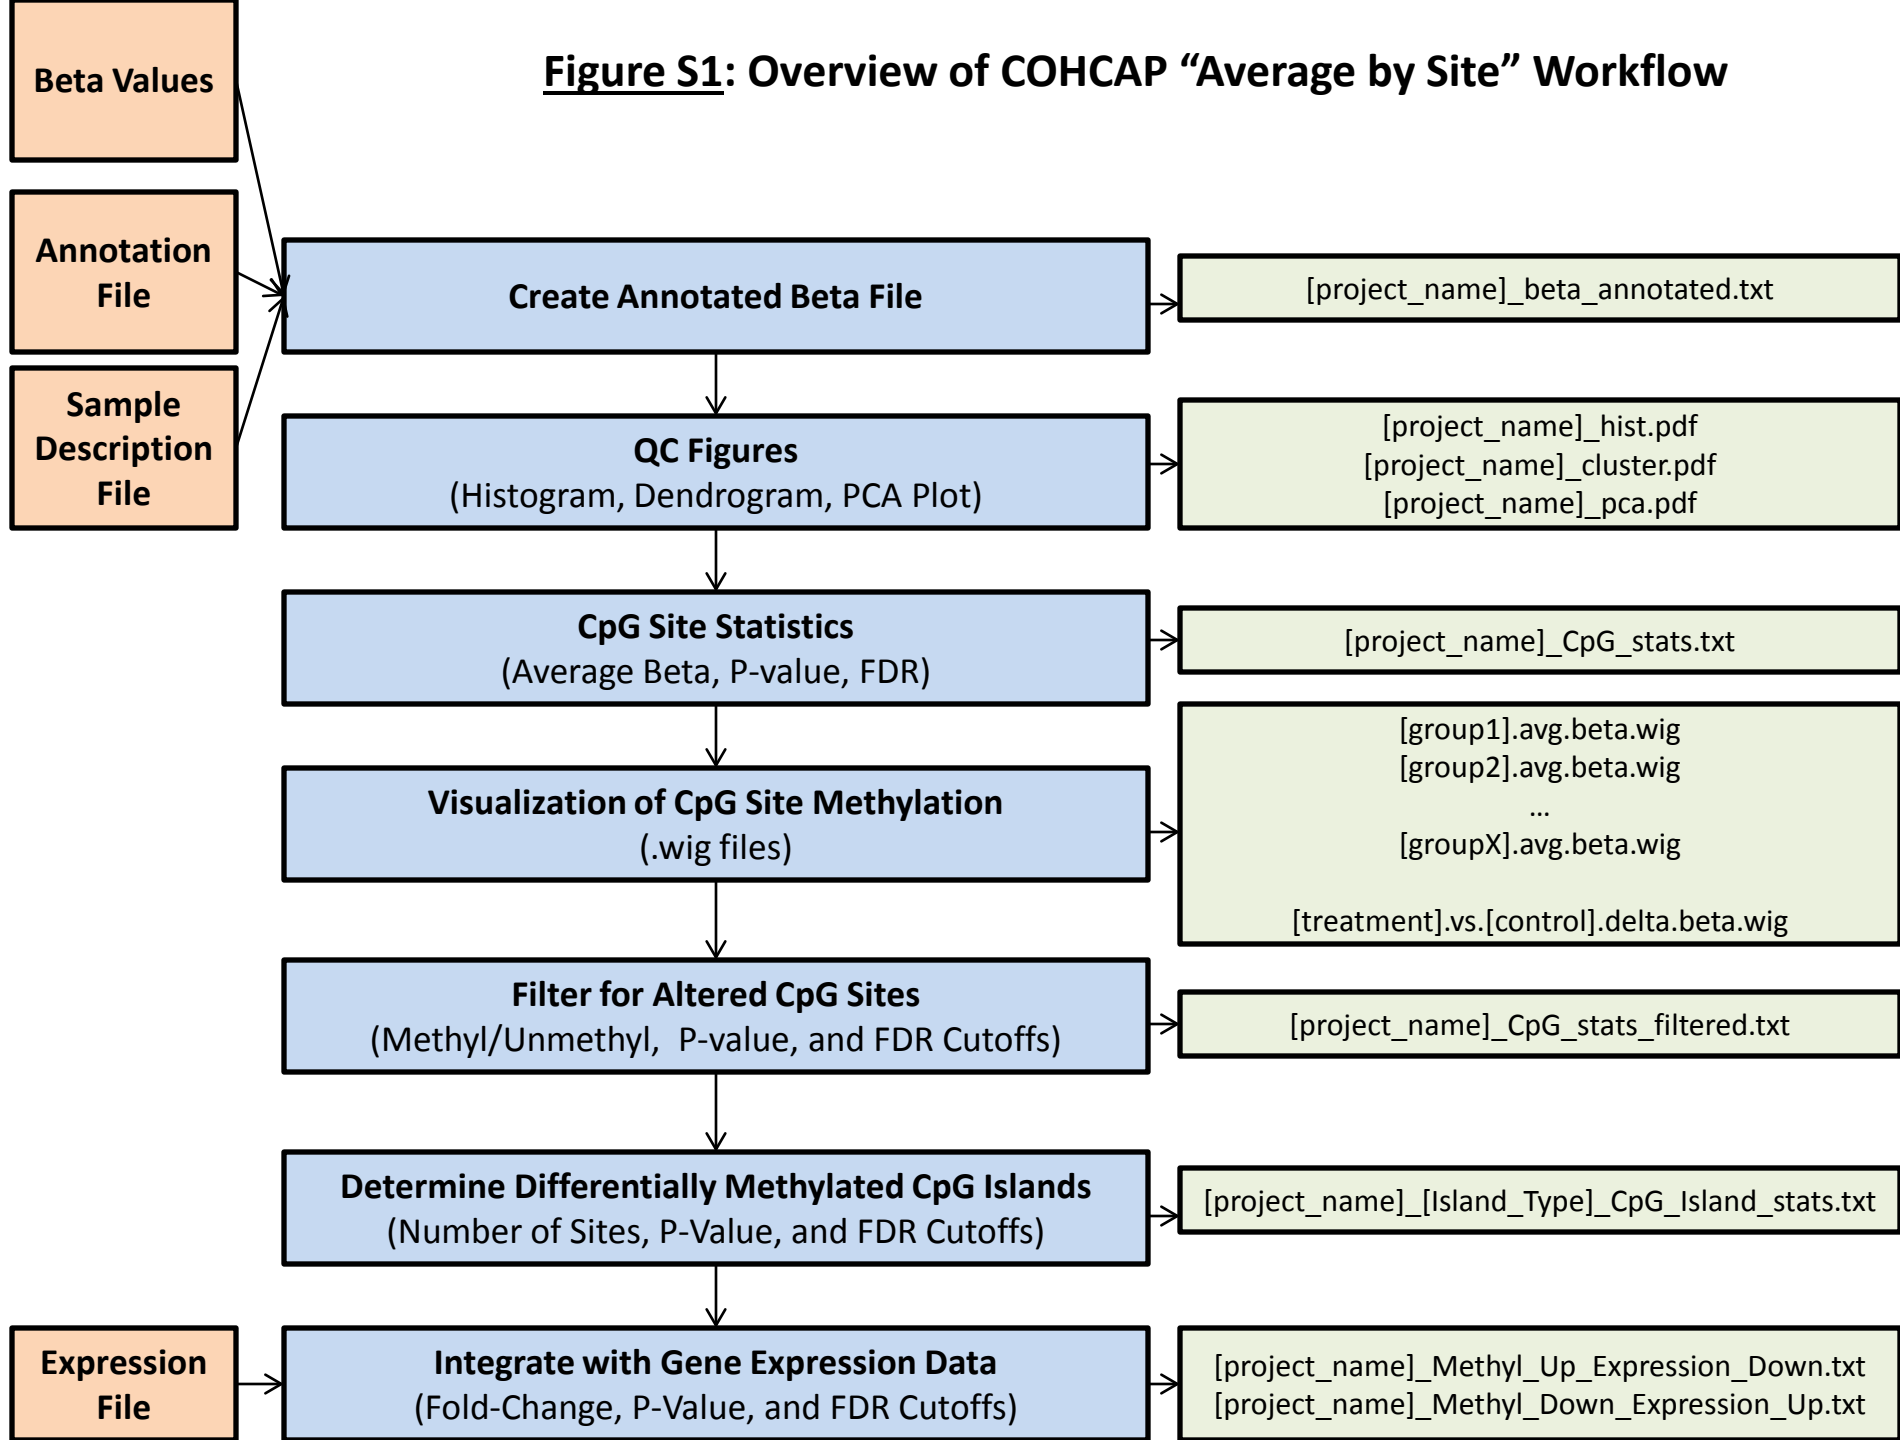



**Figure S2: Overview of COHCAP “Average by Island” Workflow**

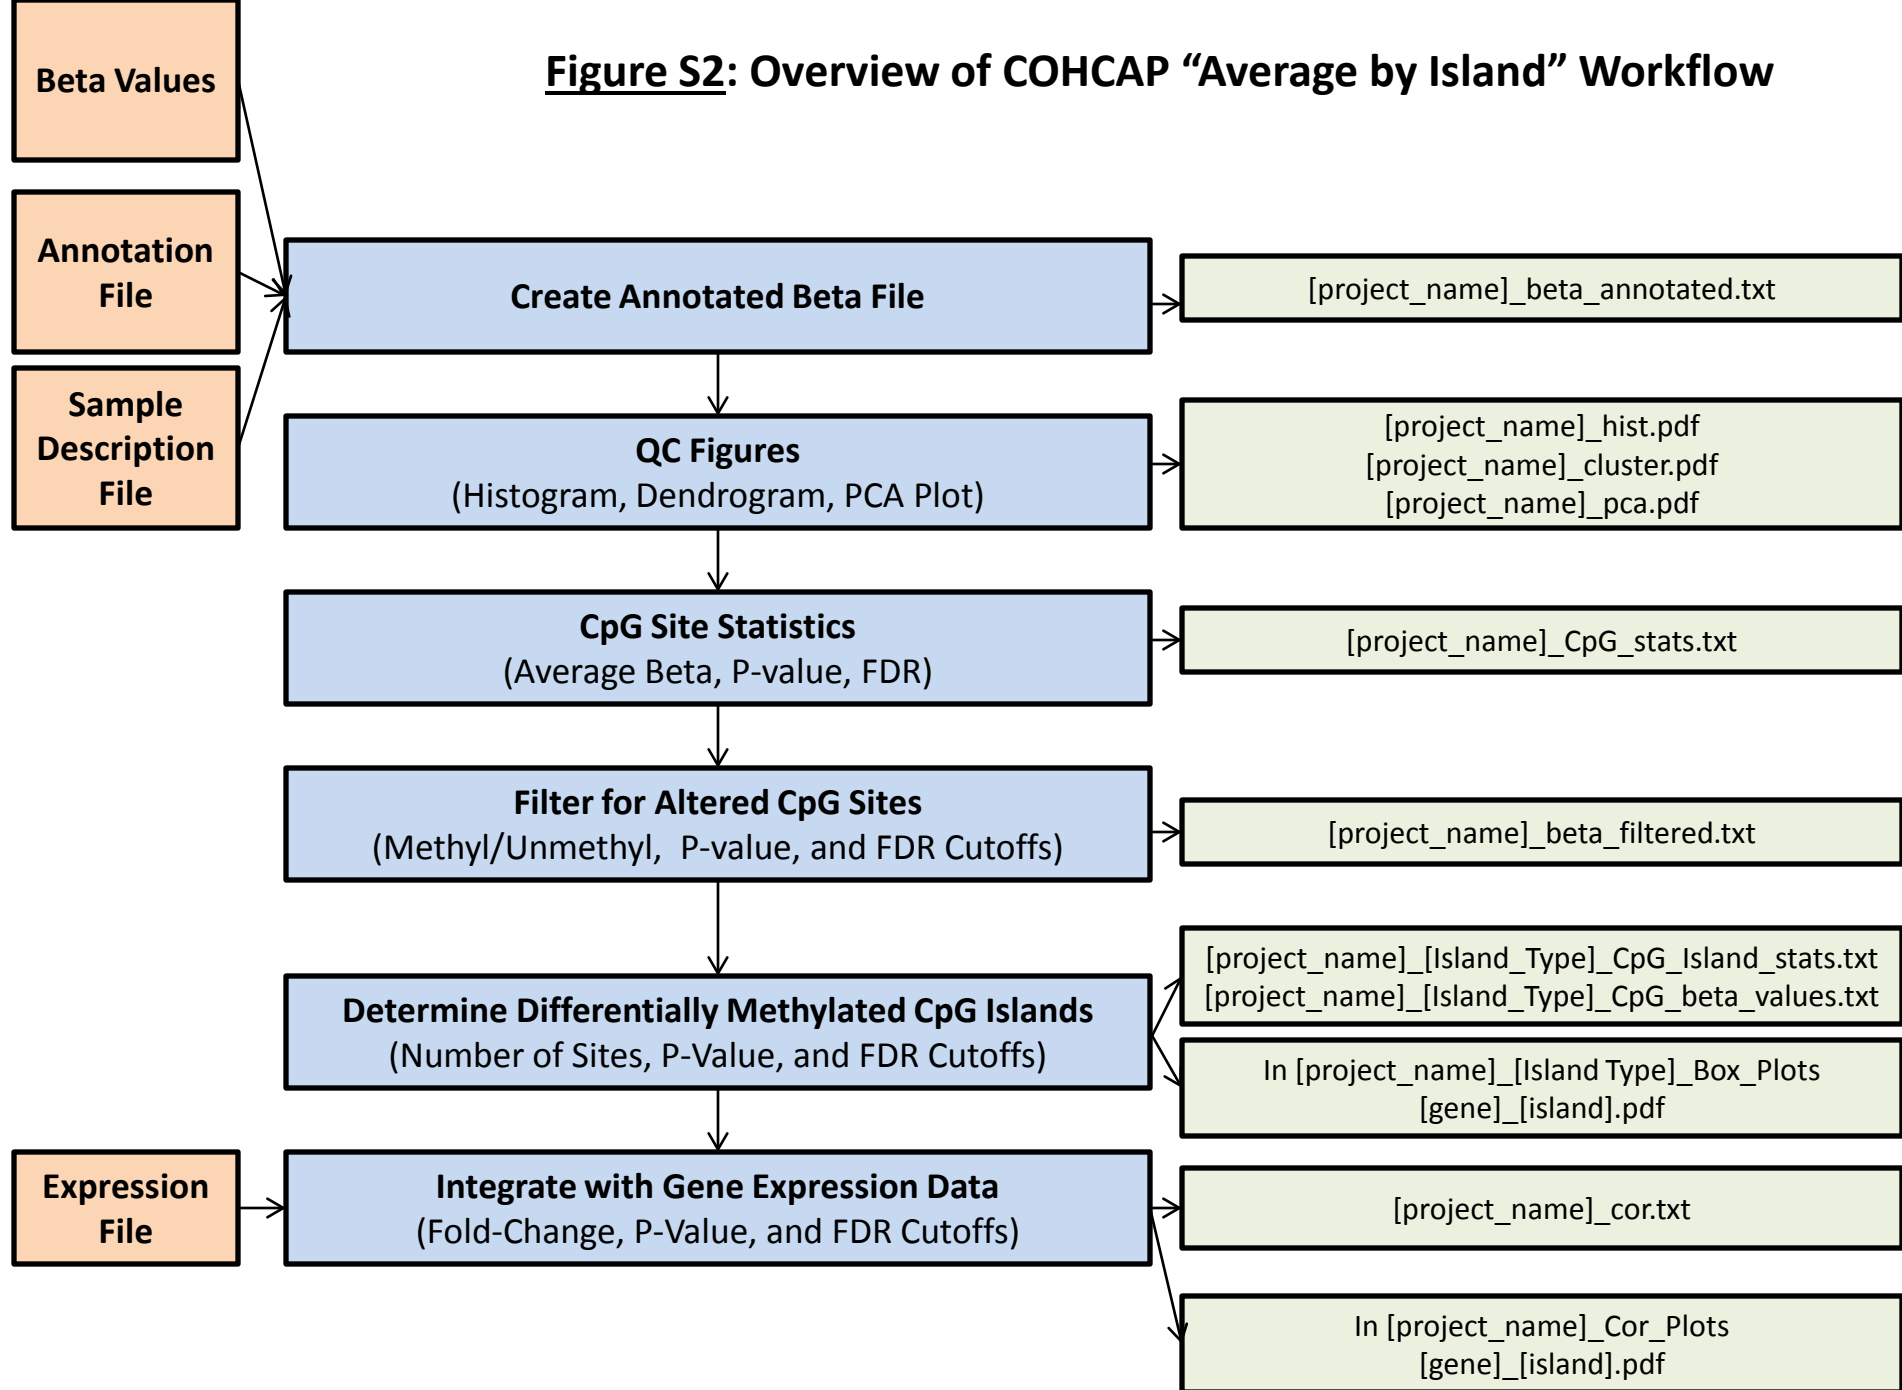

**Figure S3: Overview of 450k Analysis in This Study**

**1-Group Workflow**  
**(Binary Analysis)**

**A.**

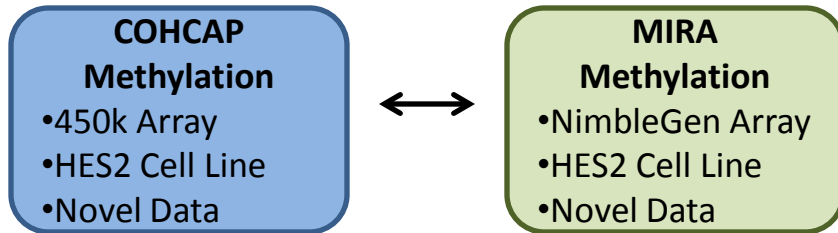

**B.**

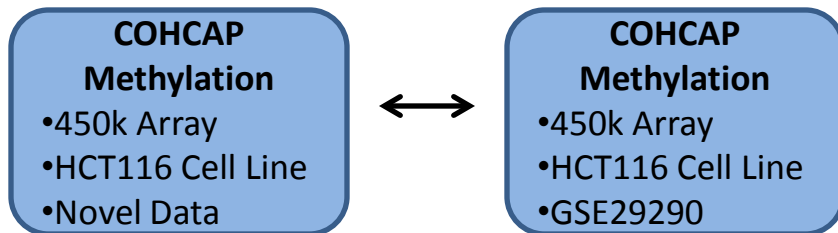

**C.**

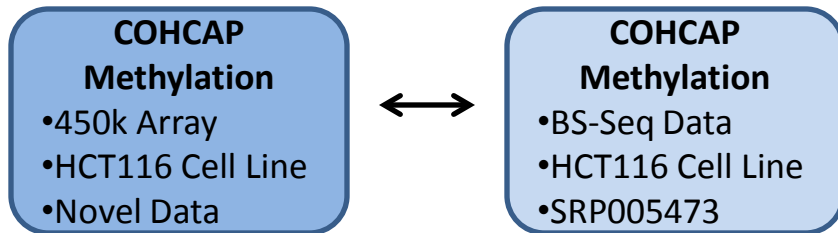

**2-Group Workflow**  
**(Continuous Analysis)**

**D.**

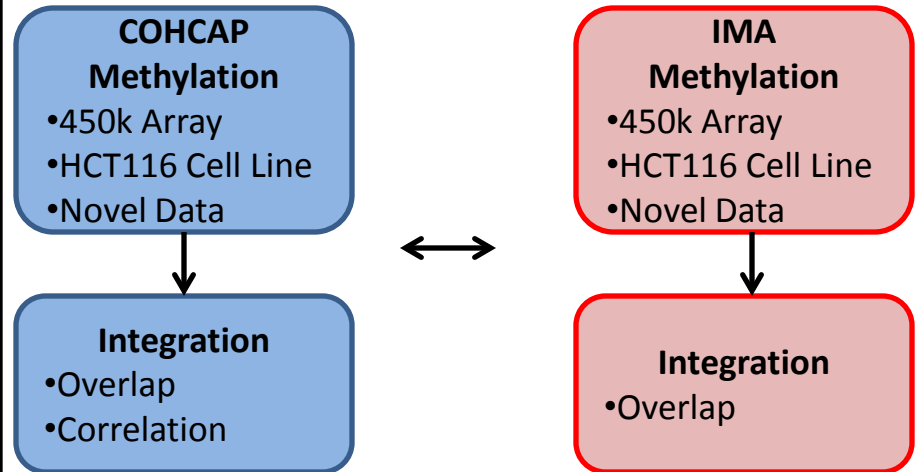

**E.**

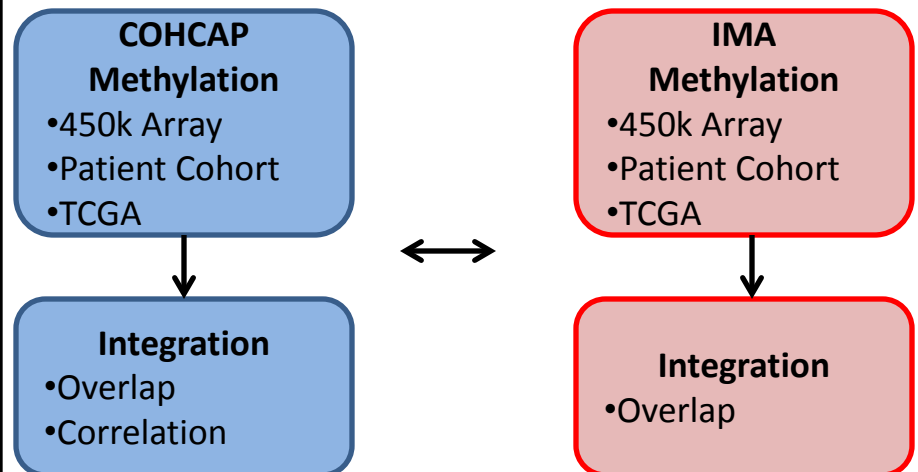

**Figure S4: Overview of BS-Seq Analysis in This Study**

**1-Group Workflow**  
**(Binary Analysis)**

**A.**

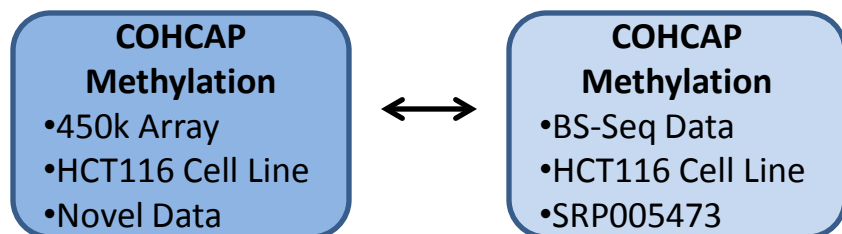

**2-Group Workflow**  
**(Continuous Analysis)**

**B.**

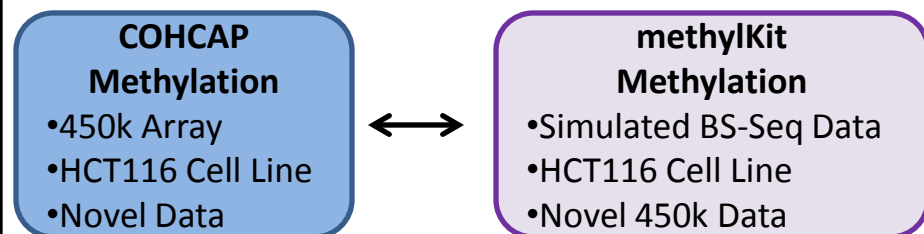

**Figure S5: Overlap with Differential Gene Expression for the HCT116 Comparison**

**A. IMA**

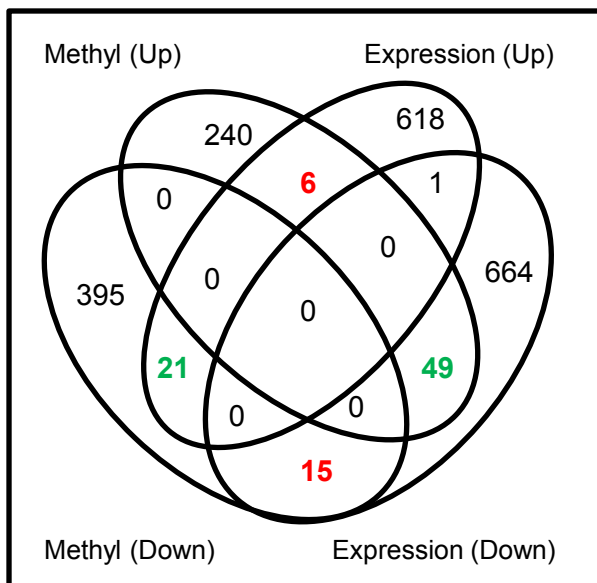

**B. COHCAP (Overlap)**

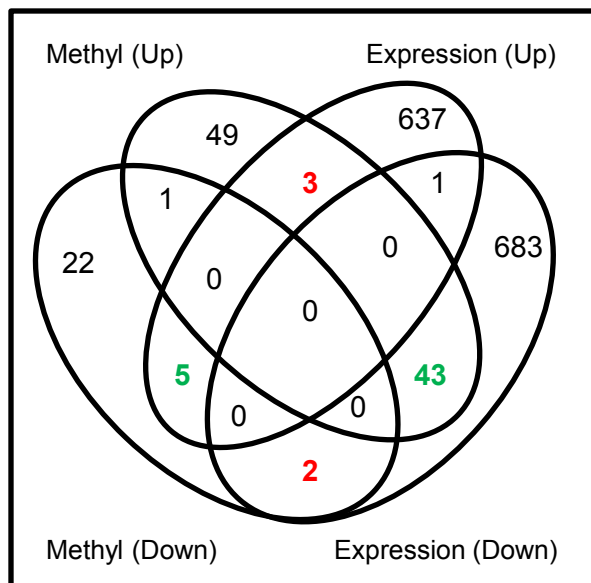

**C. COHCAP (Correlation)**

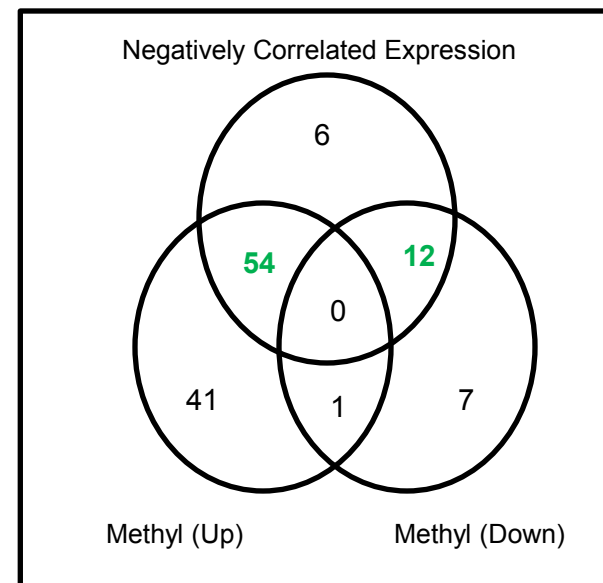

All overlap is defined based upon gene annotation. It is possible for a gene to show a negative correlation without meeting the criteria for differential methylation because the table of averaged beta values (used for correlation analysis) is only filtered based upon the number of significant CpG sites. Group-level averaging of beta values, p-values, and FDR values is calculated after this step.

**Figure S6: Validation of Selected CpG Islands and Corresponding Gene Expression**

**COHCAP Correlation**

**Gene expression by qPCR**

**DNA methylation by EpiTect**

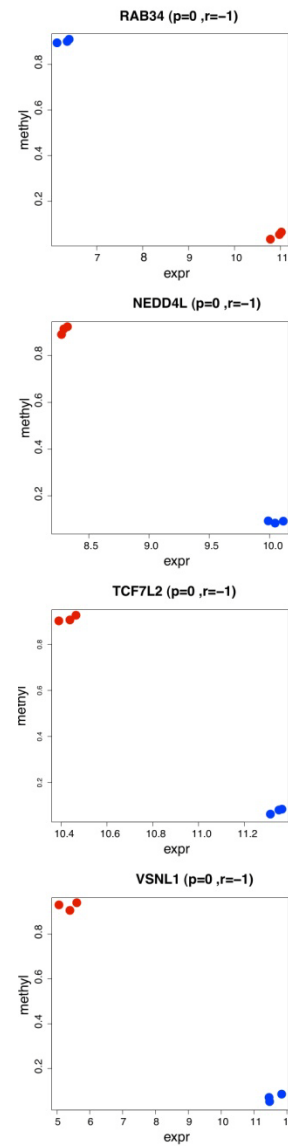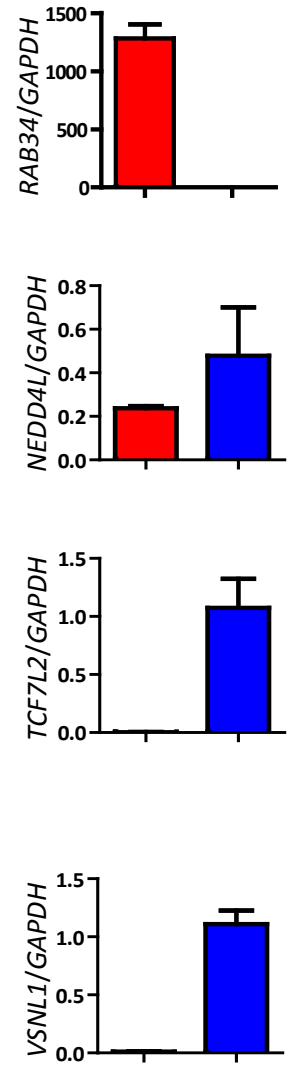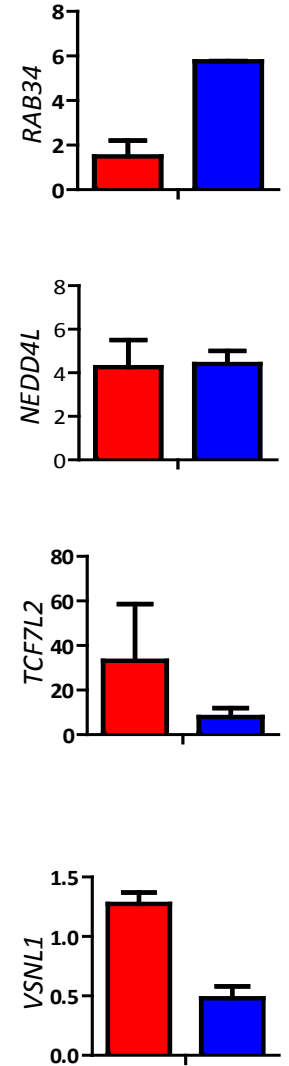

mutant parental

**Figure S7: Visualization of CpG Sites in NEDD4L Promoter**

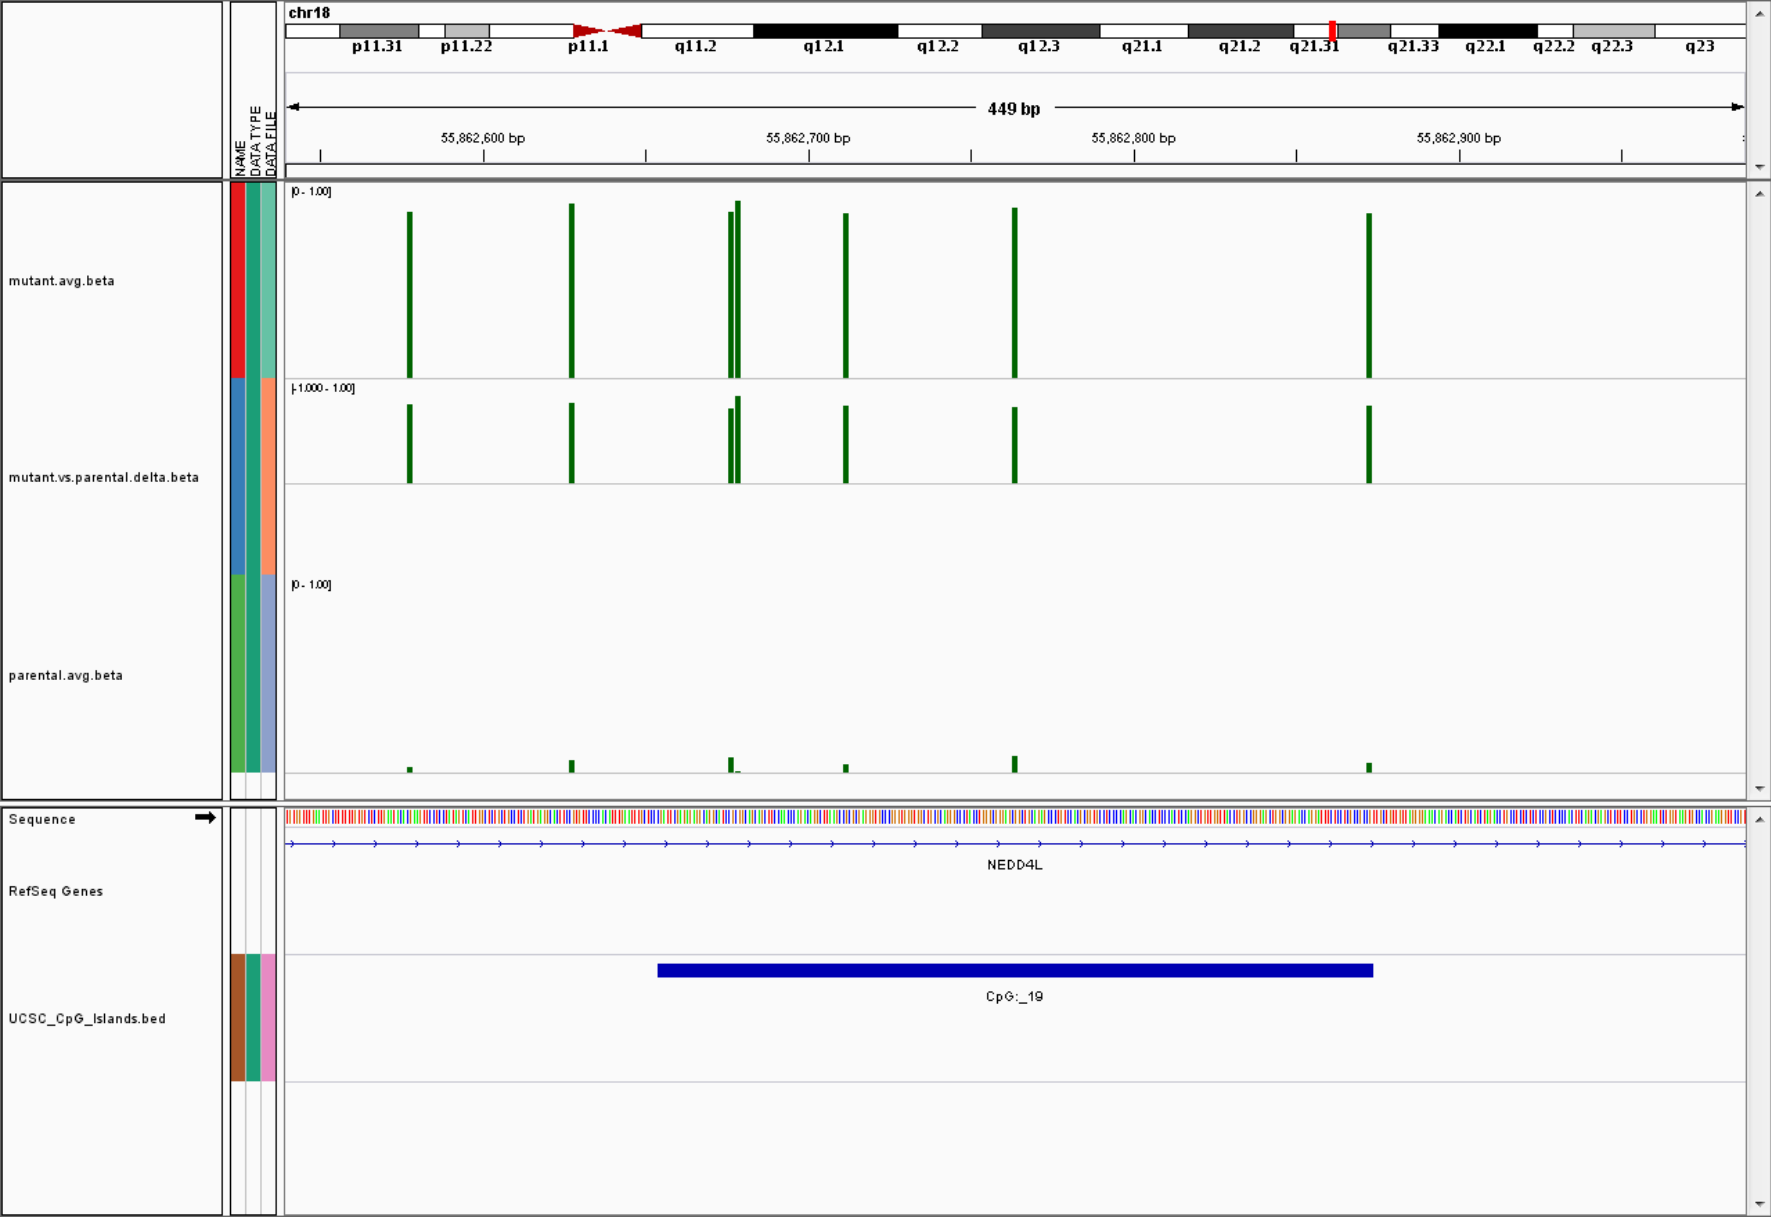

**Figure S8: Comparison of COHCAP and IMA Gene-Centric Analysis**

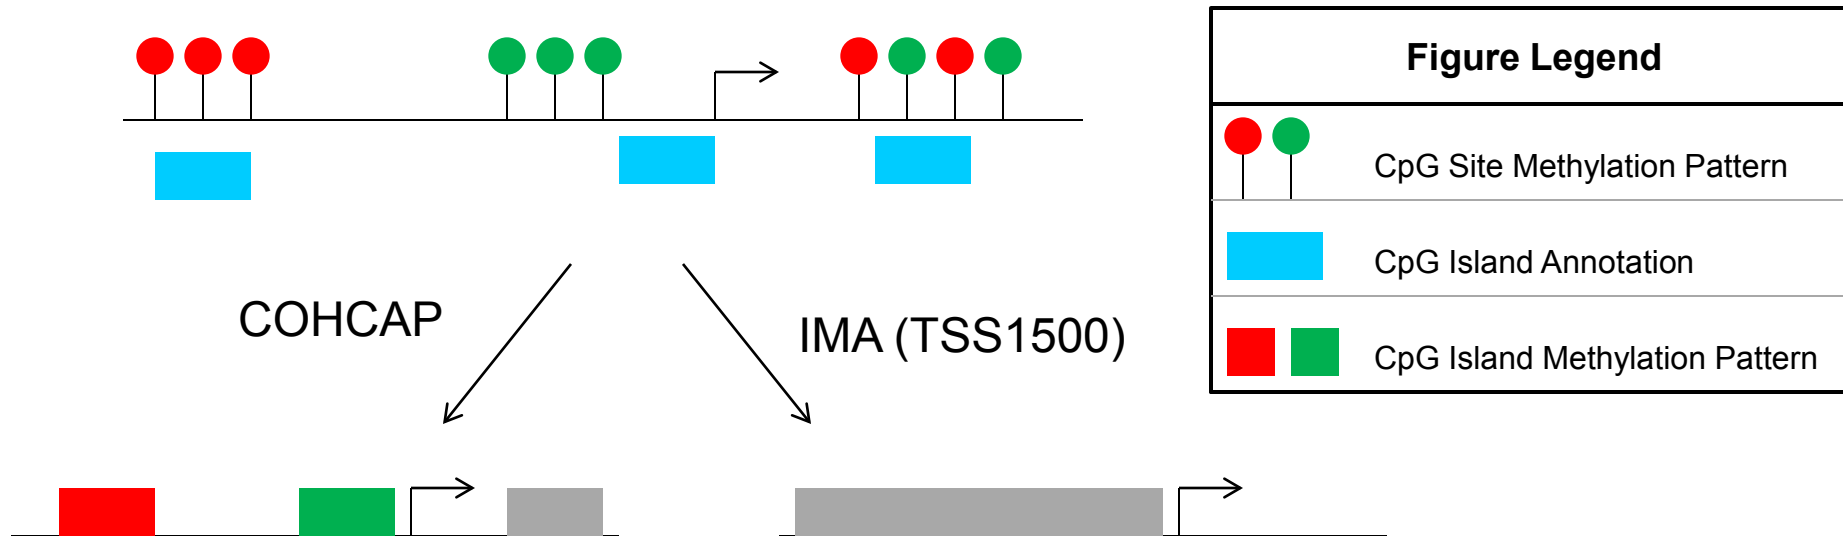

Blue boxes represent CpG island annotations (in this paper, these are the UCSC CpG islands). Circles represent CpG sites (red for increased methylation, green for decreased methylation). Boxes between sites represent CpG island behavior (red for increased methylation, green for decreased methylation, and grey for unchanged methylation). Notice that a single promoter can contain multiple CpG islands and some CpG islands are not necessarily located upstream of the transcription start site (TSS). IMA also provides CpG island analysis but does not provide gene mappings. Also, IMA segregates the UCSC CpG islands into 5 regions (ISLAND, NSHORE, SSHORE, NSHELF, SSHELF), whereas COHCAP considers all of these regions to be a single functional unit. This is why the cluster of down-regulated CpG sites causes the 2<sup>nd</sup> CpG island to be considered up-regulated (e.g. the sites in the north shore are considered in the calculation of activity for the island).

**Figure S9: Concordance with Gene Expression for the Mutant HCT116 Comparison**

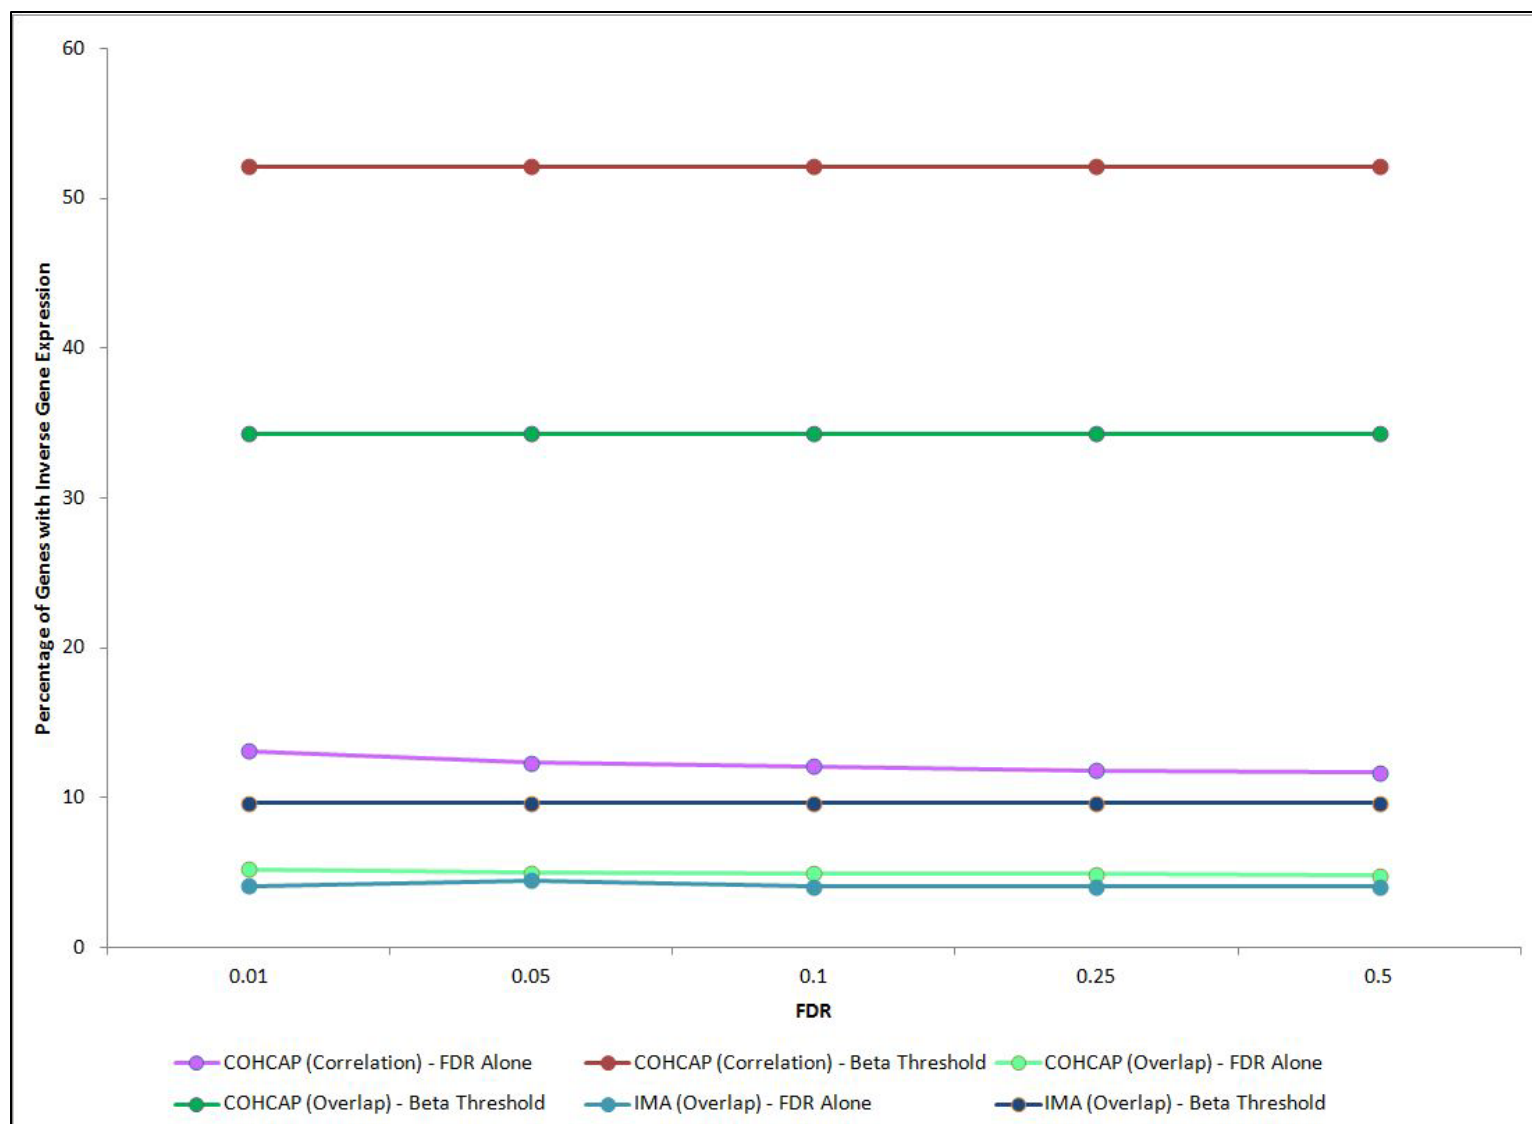



**Figure S10: Integration via Correlation Outperforms Integration via Overlap**

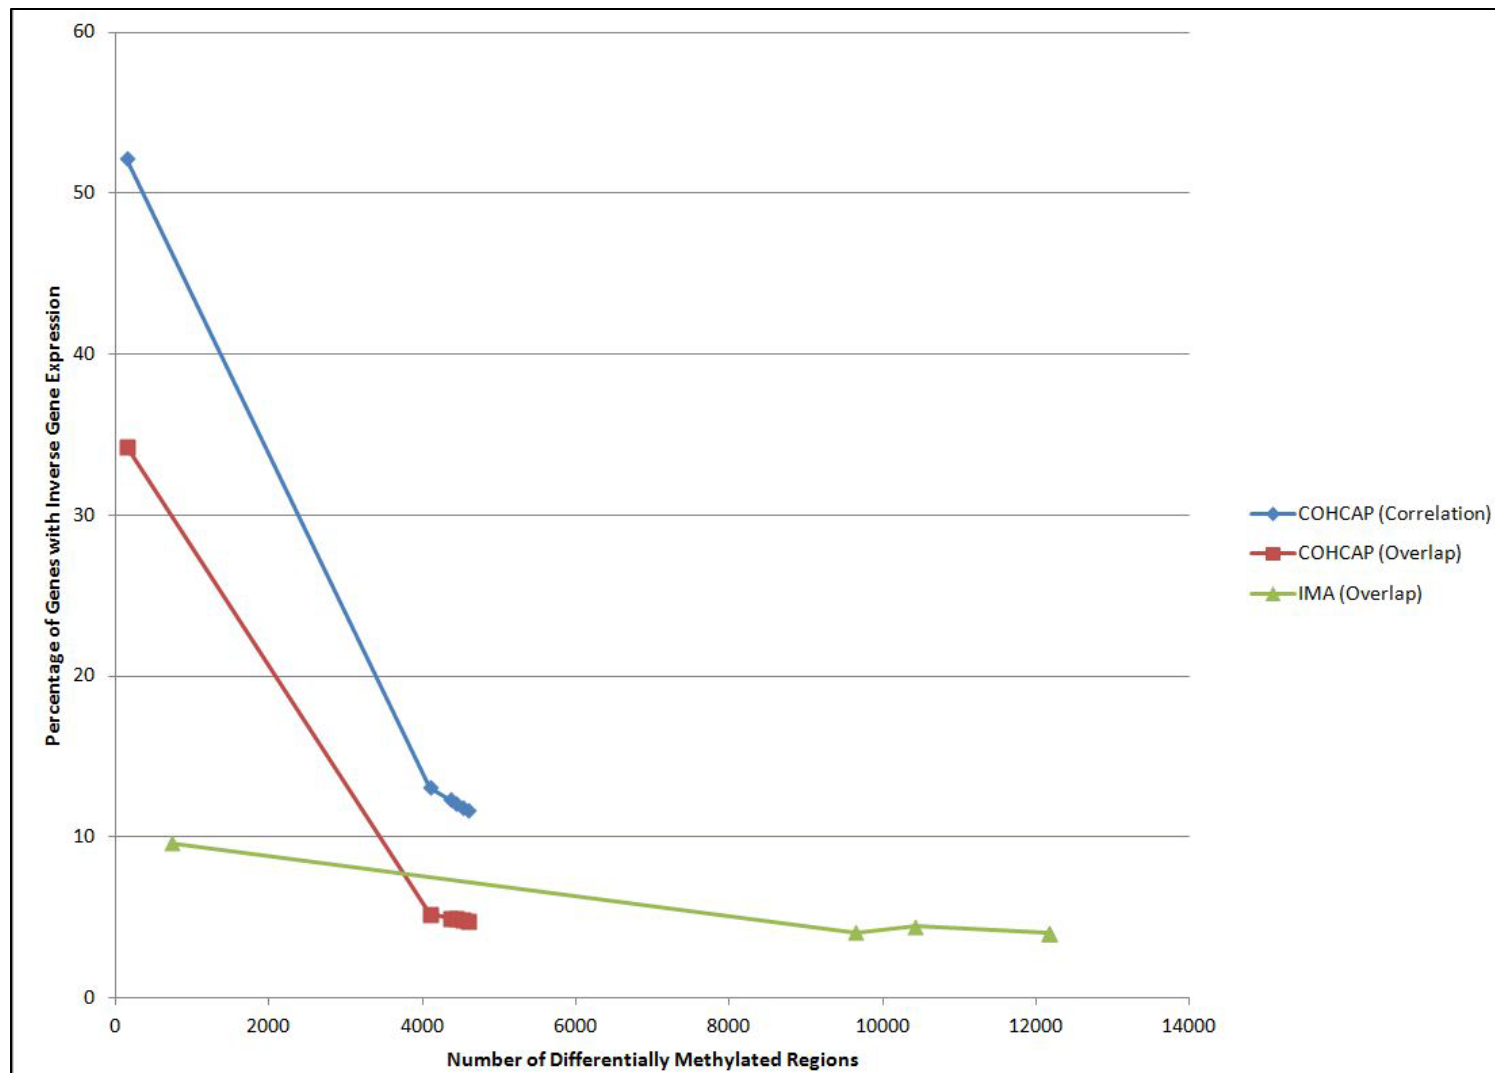

**Figure S11: Gene Expression Concordance for Small and Large Gene Lists**

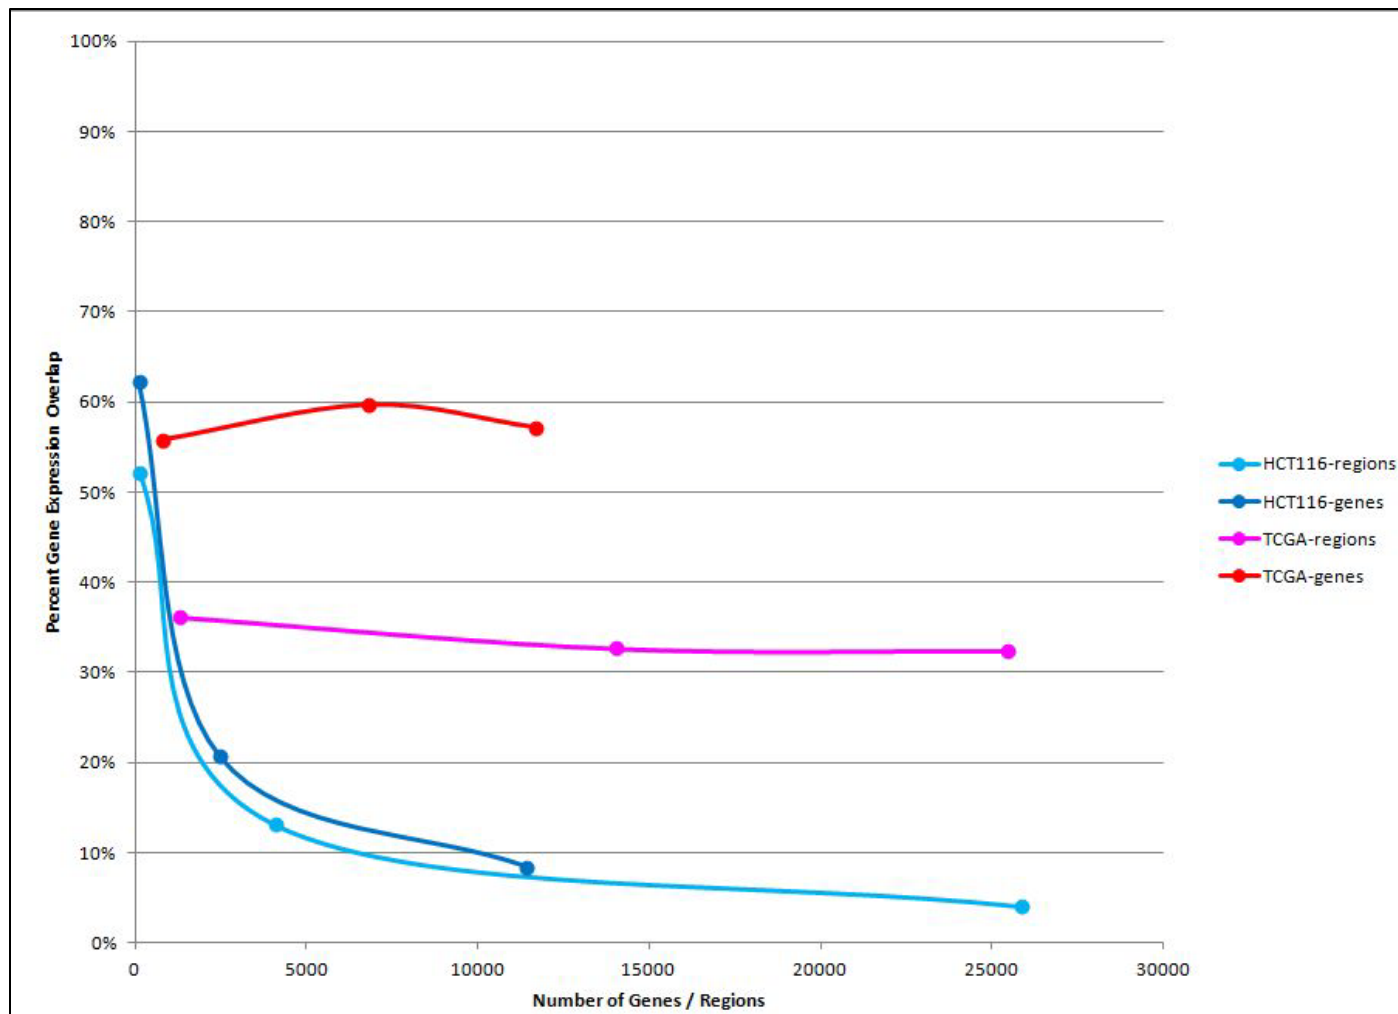

This scatter plot was created using COHCAP with 3 thresholds: 1) methylated / unmethylated threshold + FDR, 2) FDR alone, and 3) no threshold. Note that approximately 50% of the UCSC CpG islands do not map to genes.

**Figure S12: Density Distribution for COHCAP Correlation Coefficients**

HCT116

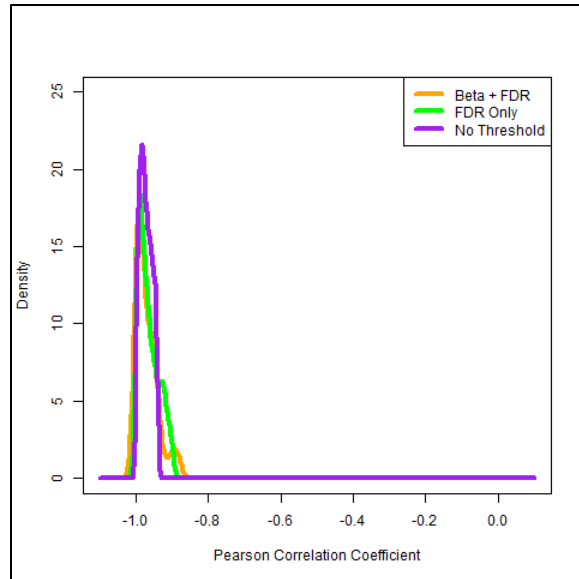

TCGA

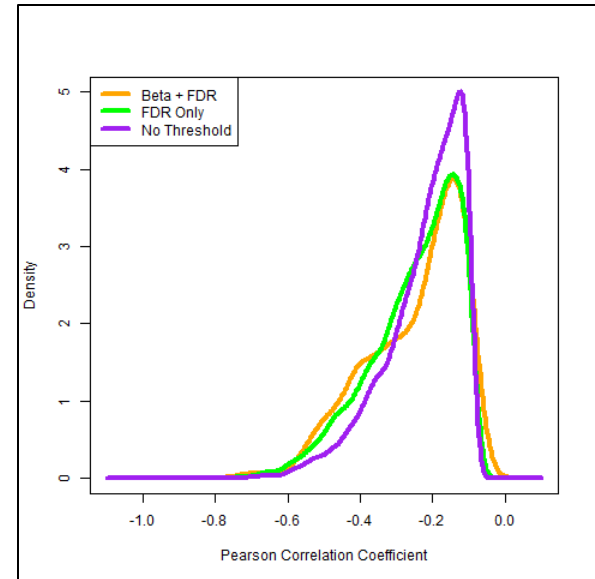

Density plots were created using COHCAP with 3 thresholds: 1) methylated / unmethylated threshold + FDR (orange lines), 2) FDR alone (green lines), and 3) no threshold (purple lines). Note that the correlation coefficient has to be quite strong to be detected in a small dataset but large patient cohorts can detect much more subtle correlations using the same criteria (and correlations tend to be weaker overall).

**Figure S13: COHCAP Selects Regions Enriched for Negative Correlations**

HCT116

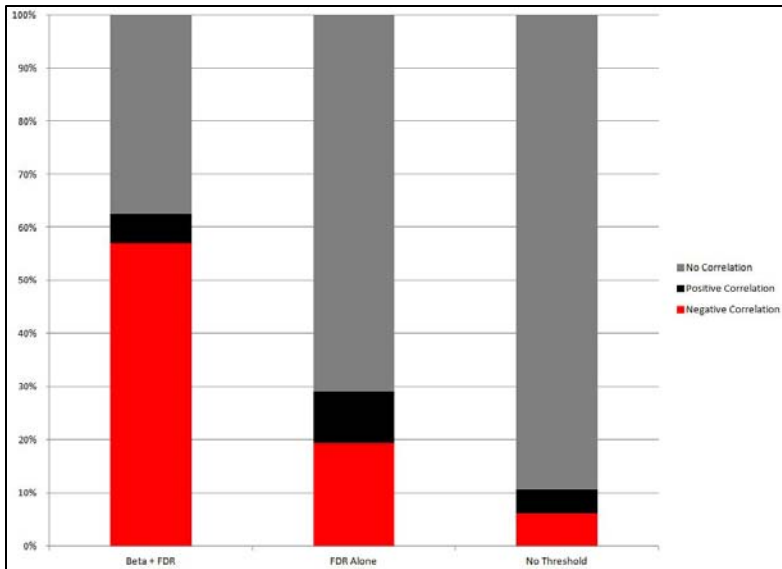

TCGA

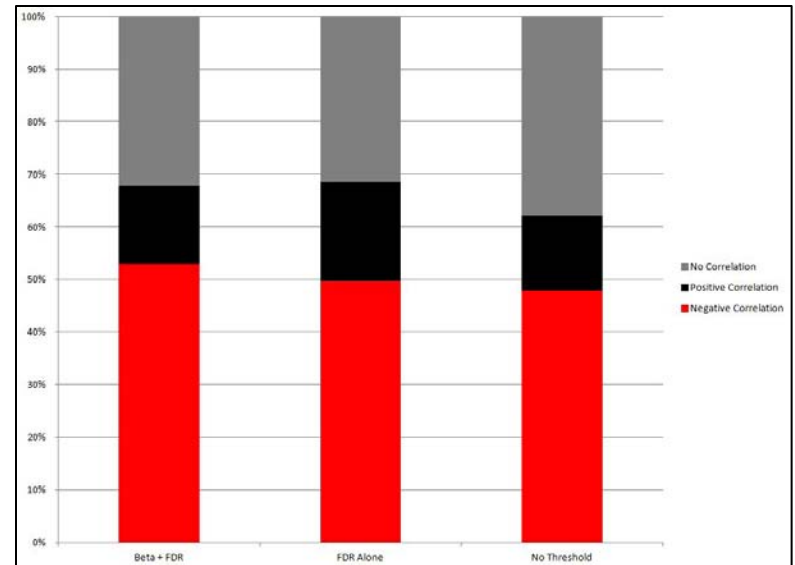

This scatter plot was created using COHCAP with 3 thresholds: 1) methylated / unmethylated threshold + FDR, 2) FDR alone, and 3) no threshold. Negative correlations are shown in red, positive correlations are shown in black, and non-significant correlations are shown in grey.

**Figure S14: Overlap with Differential Gene Expression for the TCGA Comparison**

**A. IMA**

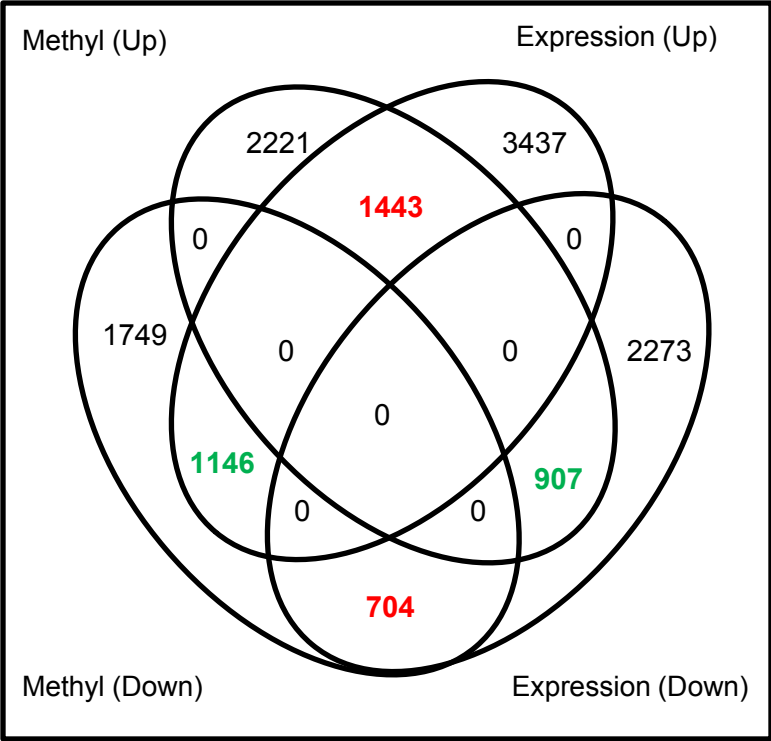

**B. COHCAP**

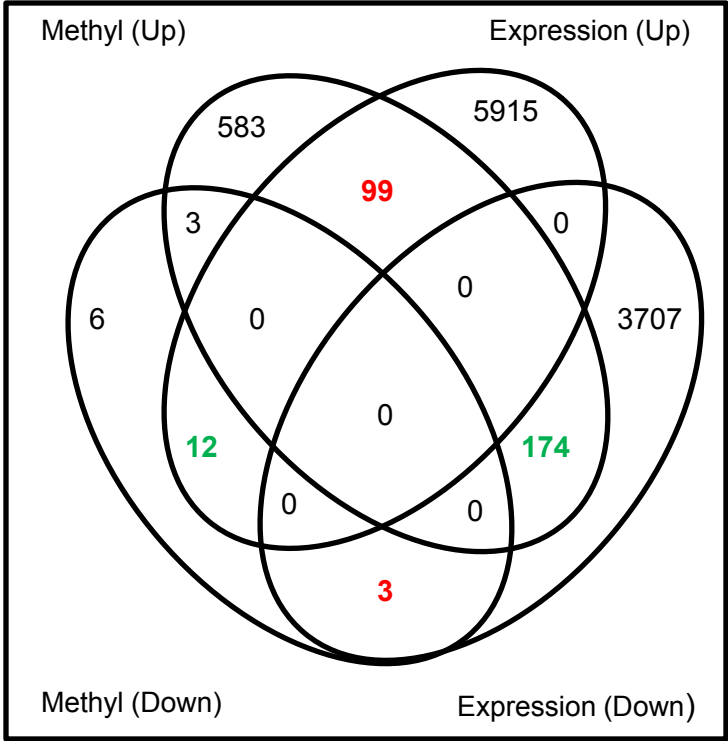

**Figure S15: ER+ Patients Show Decreased Methylation in UCSC CpG Island**

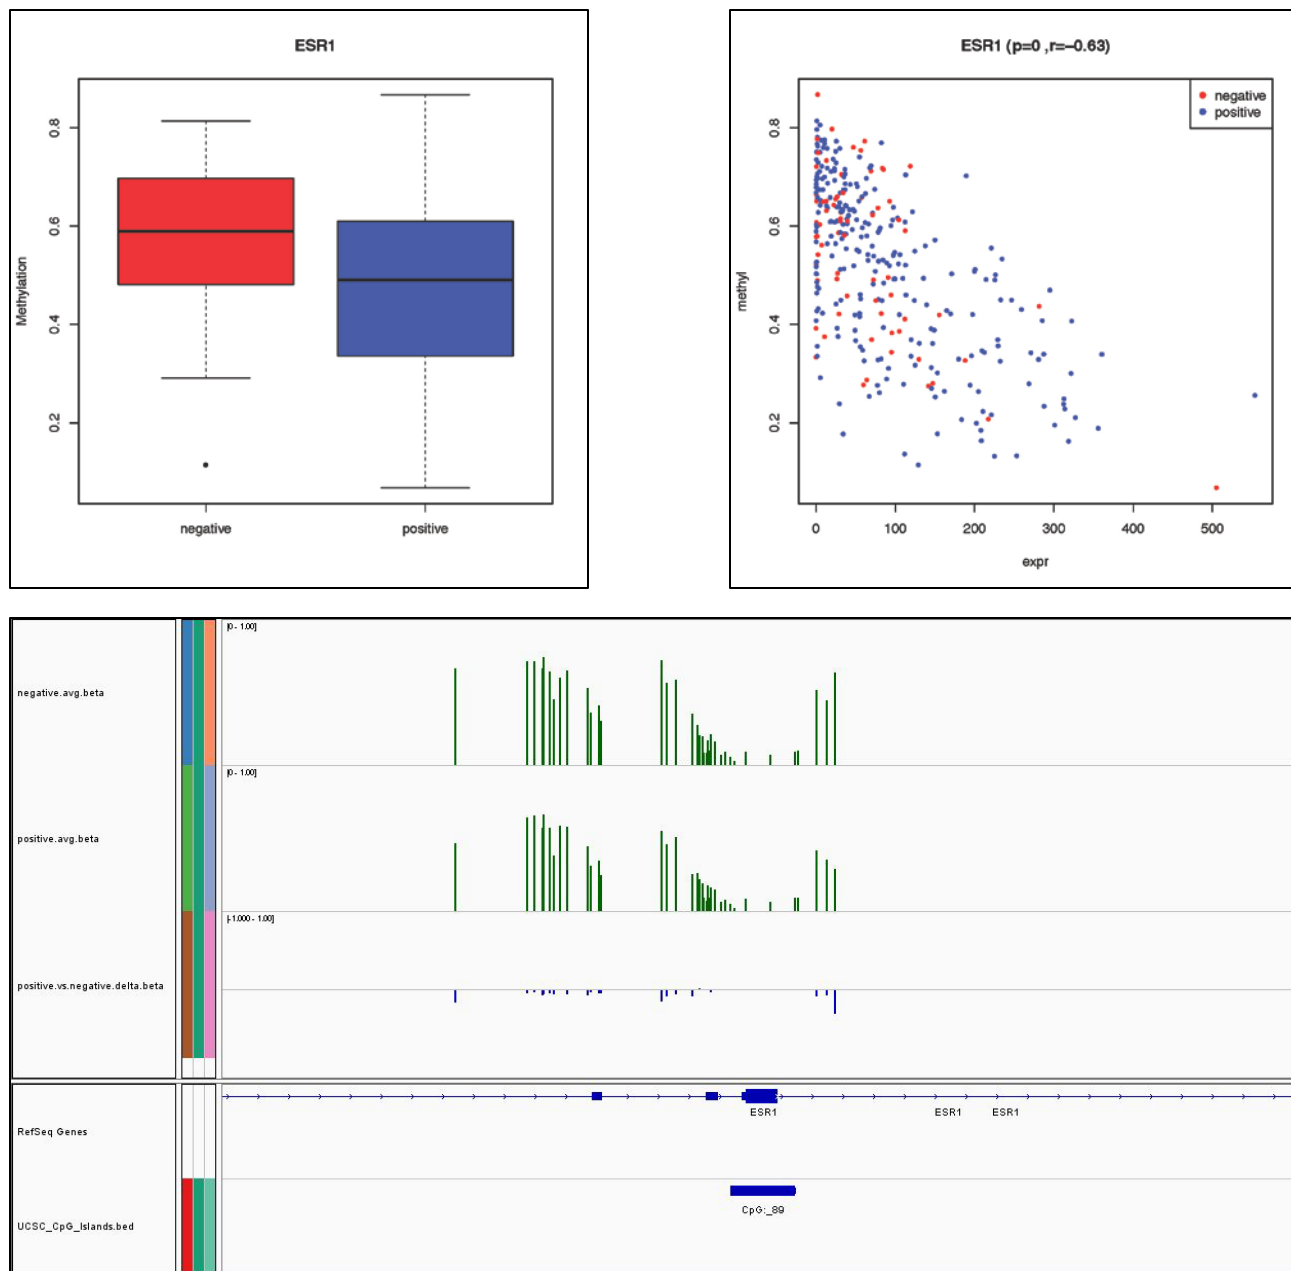

**Figure S16: Overlap between TCGA Differentially Methylated Regions for IMA and COHCAP**

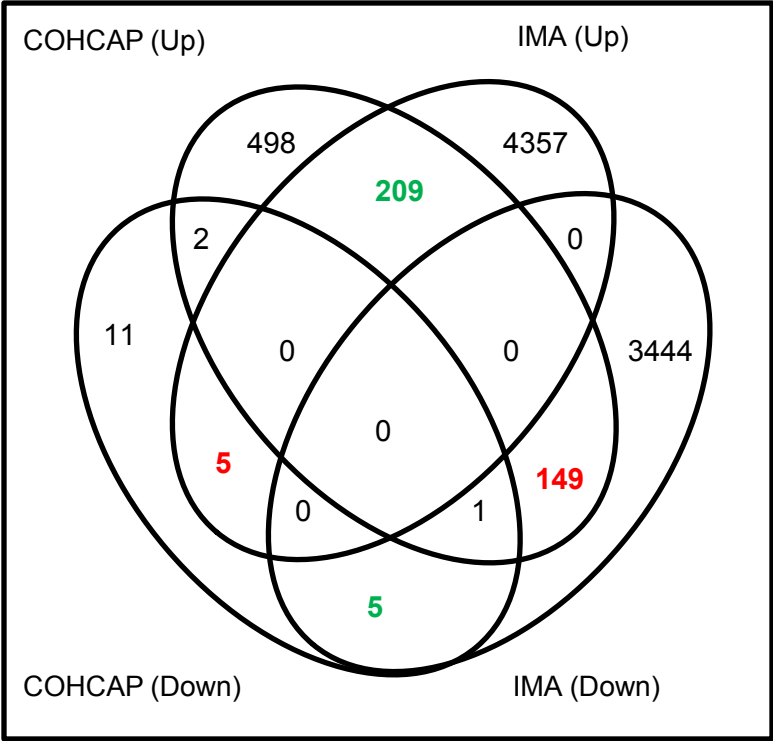

**Figure S17: Differentially Methylated Regions Mapped to PLEC**

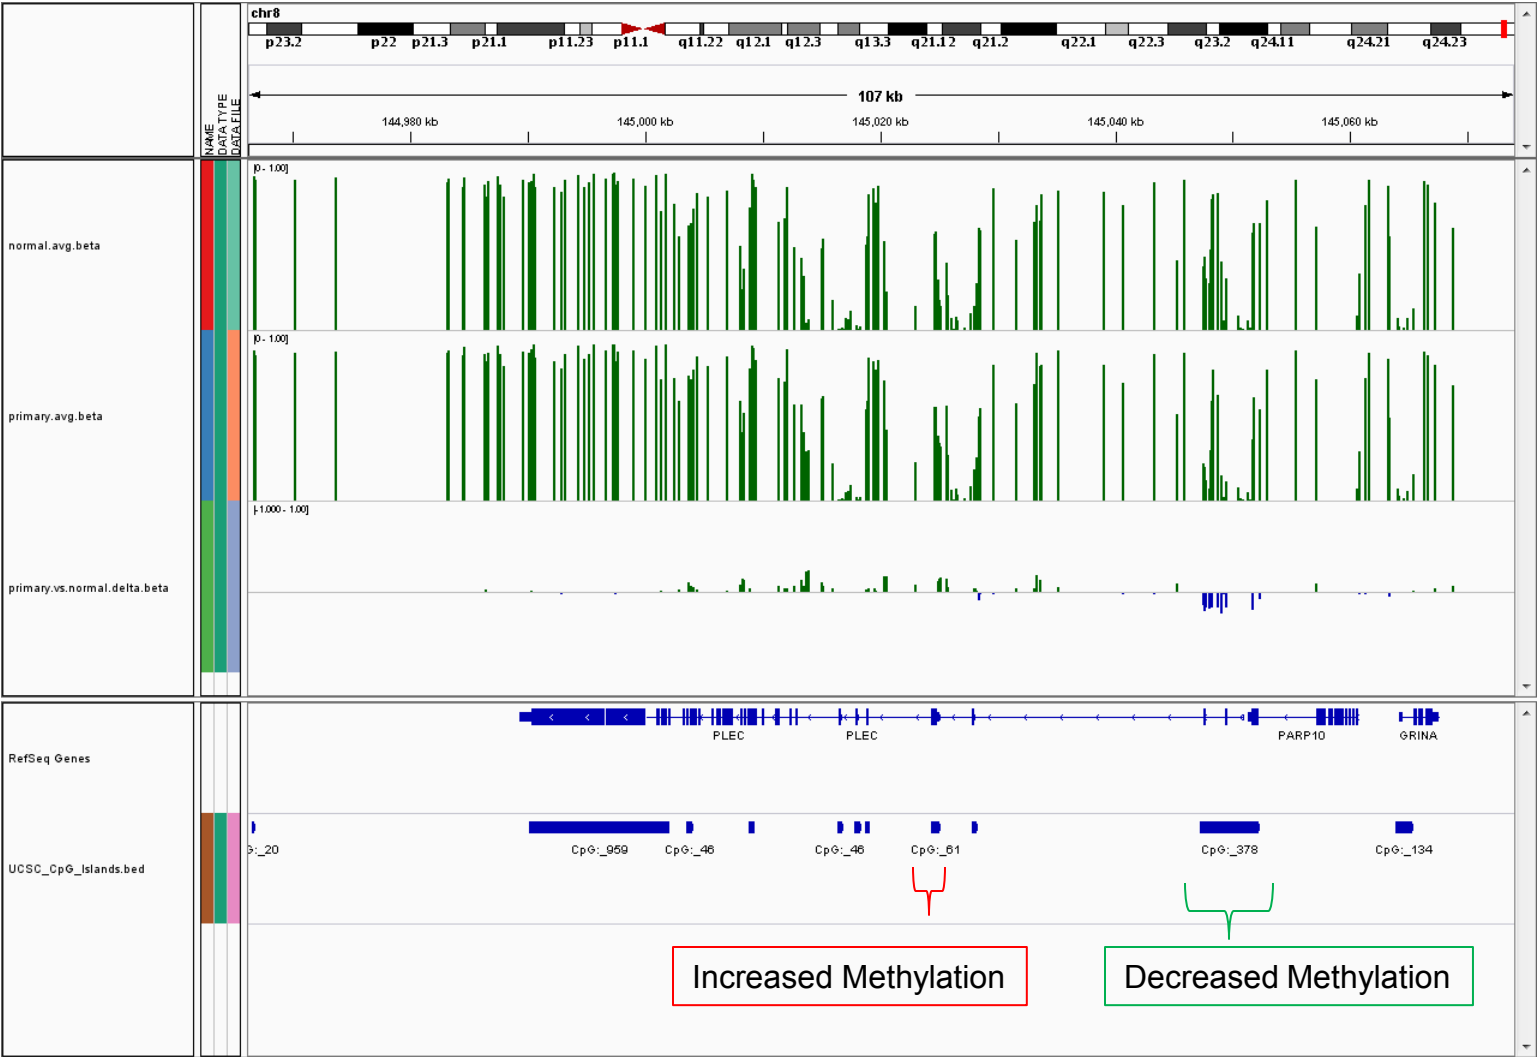



**Figure S18: COHCAP Overlap with MIRA Peaks**

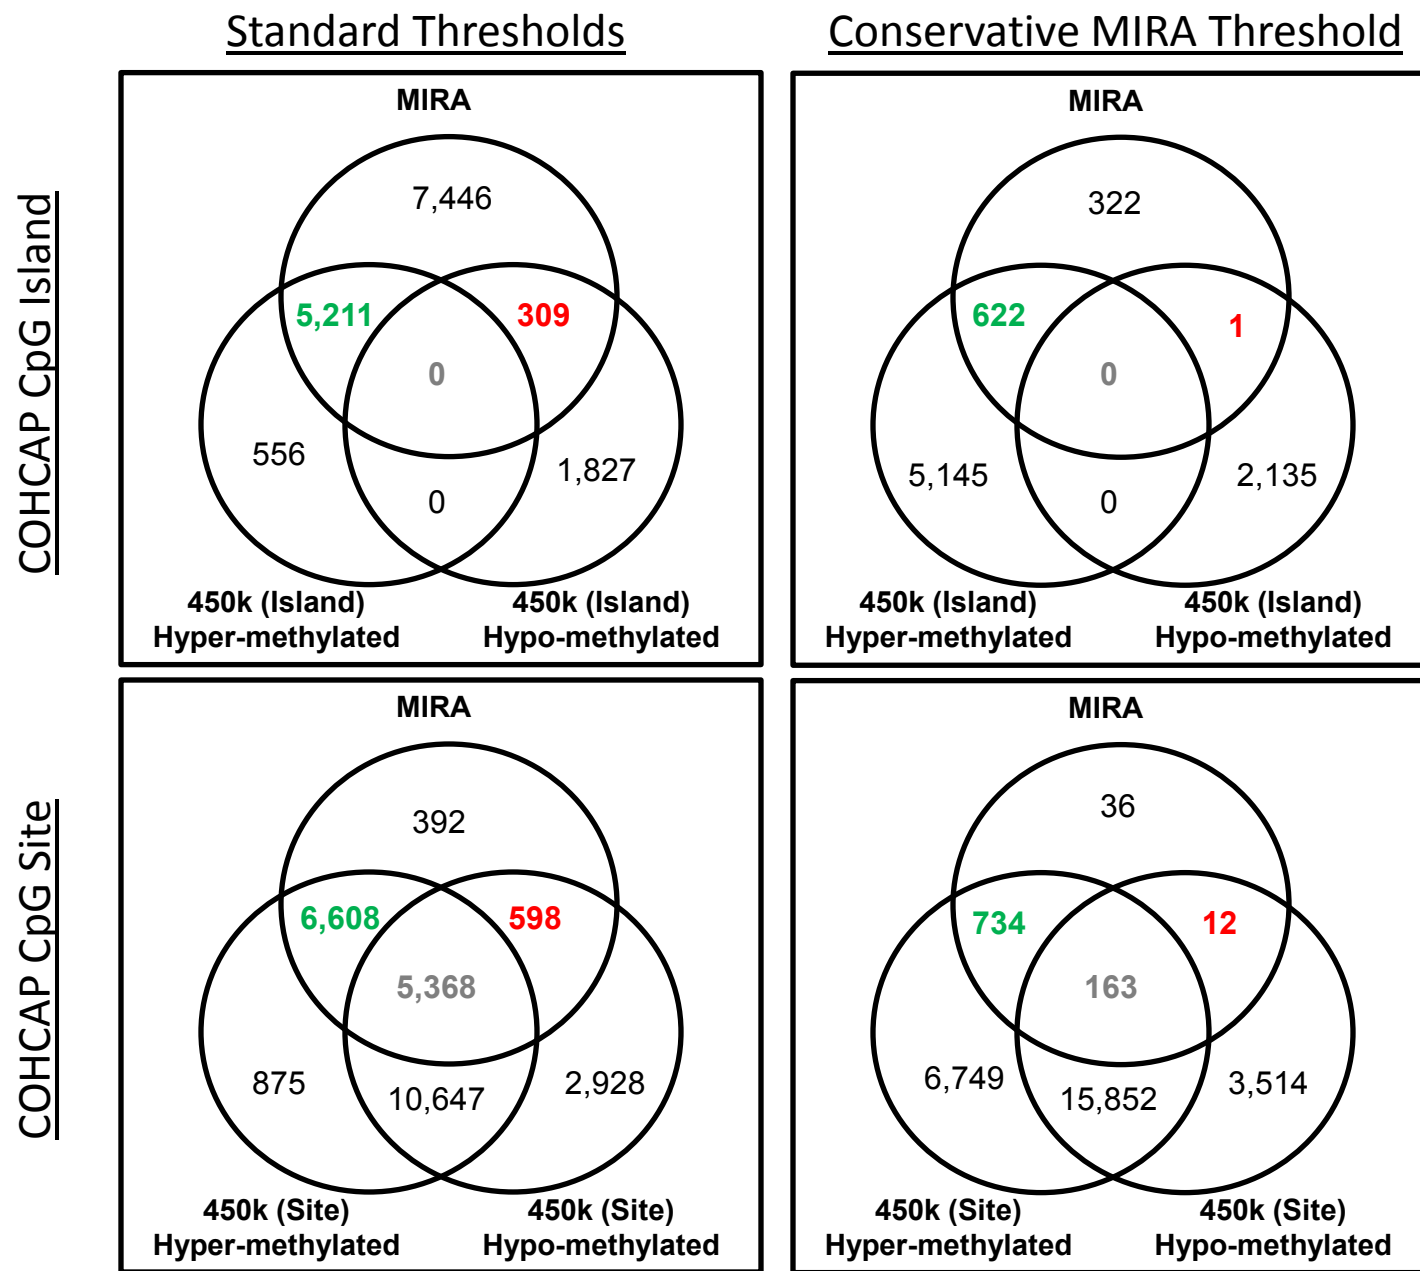

**Figure S19: Visualization of Overlapping MIRA Peak**

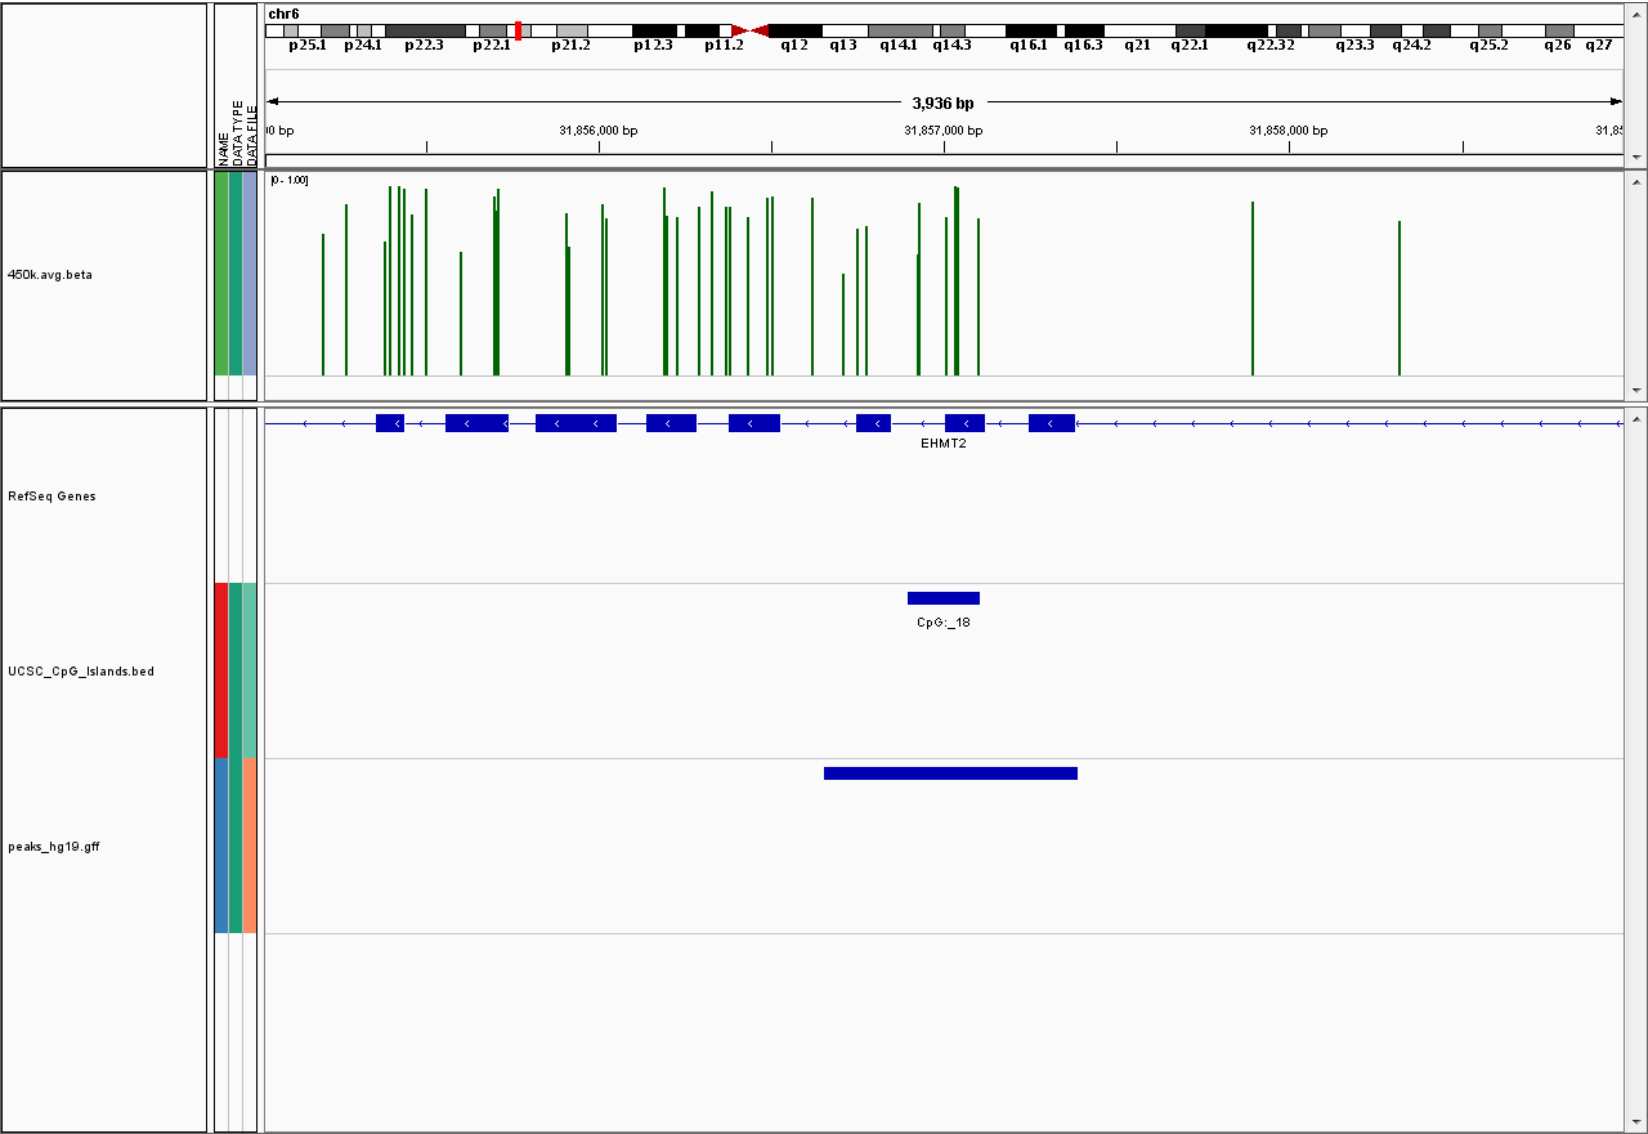

**Figure S20: Correlation of CpG Site Signal for Biological Replicates**

GSE29290  
(Illumina Array, HCT116)

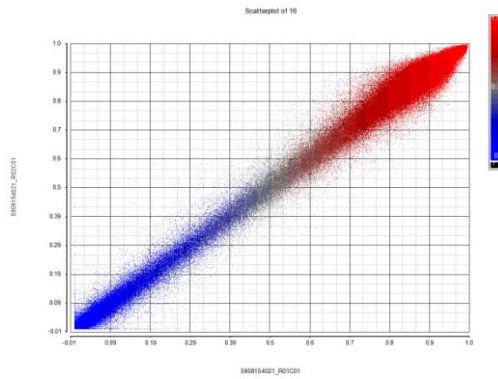

( $\rho=1.00$ )

This Study  
(Illumina Array, HCT116)

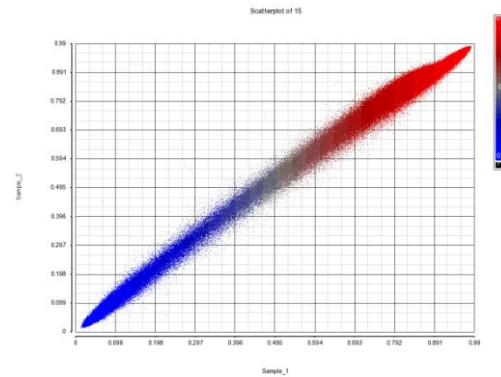

( $\rho=1.00$ )

SRP005473  
(BS-Seq, MCF7)

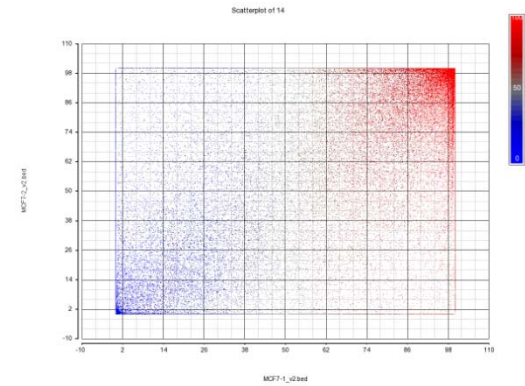

( $\rho=1.00$ )

**Figure S21: Decreased Methylation at the ESR1 TSS in Breast Tumors**

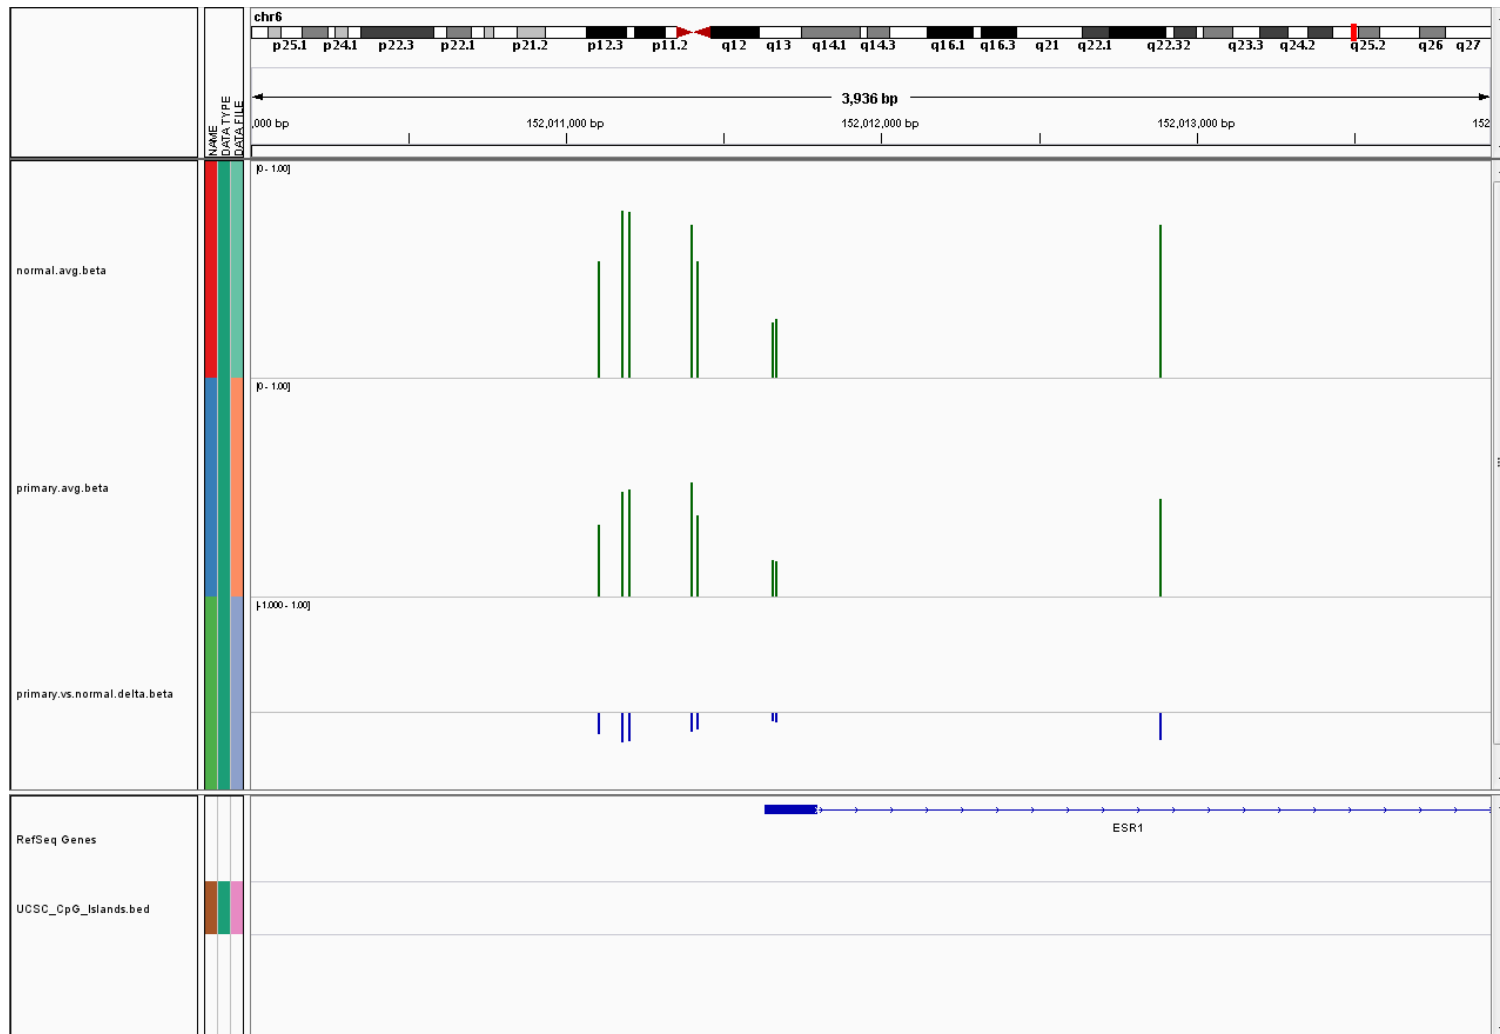

**Table S1: Comparison of COHCAP to Other Algorithms**

|                                      | COHCAP                                                                                                                                             | IMA                                                                                                     | CpGassoc                                                                                                              | NIMBL                                                                                                                                                                           |  | methylKit                                                                                                                  |
|--------------------------------------|----------------------------------------------------------------------------------------------------------------------------------------------------|---------------------------------------------------------------------------------------------------------|-----------------------------------------------------------------------------------------------------------------------|---------------------------------------------------------------------------------------------------------------------------------------------------------------------------------|--|----------------------------------------------------------------------------------------------------------------------------|
| Illumina Array                       | Yes                                                                                                                                                | Yes                                                                                                     | Yes                                                                                                                   | Yes                                                                                                                                                                             |  | No                                                                                                                         |
| BS-Seq                               | Yes                                                                                                                                                | No                                                                                                      | No                                                                                                                    | No                                                                                                                                                                              |  | Yes                                                                                                                        |
| CpG Site                             | Yes                                                                                                                                                | Yes                                                                                                     | Yes                                                                                                                   | Yes                                                                                                                                                                             |  | Yes                                                                                                                        |
| CpG Island                           | Yes (2 methods)                                                                                                                                    | Yes (region)                                                                                            | No                                                                                                                    | No                                                                                                                                                                              |  | Yes (windows)                                                                                                              |
| Criteria of Differential Methylation | <ul style="list-style-type: none"> <li>• <b>Methyl Threshold</b></li> <li>• <b>Unmethyl Threshold</b></li> <li>• P-value</li> <li>• FDR</li> </ul> | <ul style="list-style-type: none"> <li>• <b>Delta-beta</b></li> <li>• P-value</li> <li>• FDR</li> </ul> | <ul style="list-style-type: none"> <li>• P-value</li> <li>• FDR</li> </ul>                                            | <ul style="list-style-type: none"> <li>• <b>Methyl Threshold</b></li> <li>• <b>Unmethyl Threshold</b></li> <li>• <b>Delta-beta</b></li> <li>• P-value</li> <li>• FDR</li> </ul> |  | <ul style="list-style-type: none"> <li>• <b>Delta-beta</b></li> <li>• P-value</li> <li>• FDR</li> </ul>                    |
| 1-Group Analysis                     | Yes                                                                                                                                                | No                                                                                                      | No                                                                                                                    | No                                                                                                                                                                              |  | No                                                                                                                         |
| 2-Group Analysis                     | Yes                                                                                                                                                | Yes                                                                                                     | Yes                                                                                                                   | Yes                                                                                                                                                                             |  | Yes                                                                                                                        |
| >2 Group Analysis                    | Yes                                                                                                                                                | Yes (Continuous Variable)                                                                               | Yes (Continuous Variable)                                                                                             | No                                                                                                                                                                              |  | No                                                                                                                         |
| Detection P-Value Cutoff             | Optional                                                                                                                                           | Required                                                                                                | Required                                                                                                              | Required                                                                                                                                                                        |  | NA                                                                                                                         |
| Visualization                        | <ul style="list-style-type: none"> <li>• QC stats</li> <li>• <b>.wig file</b></li> <li>• <b>Box-Plot</b></li> <li>• <b>Scatterplot</b></li> </ul>  | QC stats                                                                                                | <ul style="list-style-type: none"> <li>• QC stats</li> <li>• <b>Scatterplot</b></li> <li>• <b>Box-Plot</b></li> </ul> | <ul style="list-style-type: none"> <li>• QC stats</li> <li>• <b>Gene View</b></li> <li>• <b>Box-Plot</b></li> <li>• <b>Venn Diagram</b></li> </ul>                              |  | <ul style="list-style-type: none"> <li>• QC stats</li> <li>• <b>Bedgraph</b></li> <li>• <b>Annotation plots</b></li> </ul> |
| Integration with Gene Expression     | Yes                                                                                                                                                | No                                                                                                      | No                                                                                                                    | No                                                                                                                                                                              |  | No                                                                                                                         |
| Programming Language                 | Perl<br>R<br>(Java - GUI)                                                                                                                          | R                                                                                                       | R<br>(MATLAB - GUI)                                                                                                   | MATLAB                                                                                                                                                                          |  | R                                                                                                                          |

**NOTE:** COHCAP does provide delta beta values in the output file, but it is not currently considered as part of the filtering process for the workflows.

**Table S2: Variations between COHCAP Algorithms****A. Average by CpG Site**

|                     | CpG Site Analysis                                                    | Filtering                                          | CpG Island Analysis                     | Integration |
|---------------------|----------------------------------------------------------------------|----------------------------------------------------|-----------------------------------------|-------------|
| <b>1 Group</b>      | <u>Unpaired:</u><br>Average $\beta$                                  | <u>Unpaired:</u><br>Average $\beta$                | <u>Unpaired:</u><br>Fisher's Exact Test | NA          |
|                     | <u>Paired:</u><br>NA                                                 | <u>Paired:</u><br>NA                               | <u>Paired:</u><br>NA                    |             |
| <b>2 Groups</b>     | <u>Unpaired:</u><br>Group Site $\beta$<br>t-test                     | Methyl Cutoff<br>Unmethyl Cutoff<br>P-Value<br>FDR | 2-way ANOVA<br>(Group, Site)            | Overlap     |
|                     | <u>Paired:</u><br>Group Site $\beta$<br>2-way ANOVA<br>(Group, Pair) |                                                    |                                         |             |
| <b>&gt;2 Groups</b> | <u>Unpaired:</u><br>Group Site $\beta$<br>1-way ANOVA<br>(Group)     | P-Value<br>FDR                                     | 2-way ANOVA<br>(Group, Site)            | NA          |
|                     | <u>Paired:</u><br>Group Site $\beta$<br>2-way ANOVA<br>(Group, Pair) |                                                    |                                         |             |

**B. Average within CpG Island (Default)**

|                     | CpG Site Analysis                                                    | Filtering                                                   | CpG Island Analysis                                                    | Integration |
|---------------------|----------------------------------------------------------------------|-------------------------------------------------------------|------------------------------------------------------------------------|-------------|
| <b>1 Group</b>      | <u>Unpaired:</u><br>Average $\beta$                                  | <u>Unpaired:</u><br>Average $\beta$<br><u>Paired:</u><br>NA | <u>Unpaired:</u><br>Average $\beta$                                    | Correlation |
|                     | <u>Paired:</u><br>NA                                                 |                                                             | <u>Paired:</u><br>NA                                                   |             |
| <b>2 Groups</b>     | <u>Unpaired:</u><br>Group Site $\beta$<br>t-test                     | Methyl Cutoff<br>Unmethyl Cutoff<br>P-Value<br>FDR          | <u>Unpaired:</u><br>Group Island $\beta$<br>t-test                     | Correlation |
|                     | <u>Paired:</u><br>Group Site $\beta$<br>2-way ANOVA<br>(Group, Pair) |                                                             | <u>Paired:</u><br>Group Island $\beta$<br>2-way ANOVA<br>(Group, Pair) |             |
| <b>&gt;2 Groups</b> | <u>Unpaired:</u><br>Group Site $\beta$<br>1-way ANOVA<br>(Group)     | P-Value<br>FDR                                              | <u>Unpaired:</u><br>Group Island $\beta$<br>1-way ANOVA<br>(Group)     | Correlation |
|                     | <u>Paired:</u><br>Group Site $\beta$<br>2-way ANOVA<br>(Group, Pair) |                                                             | <u>Paired:</u><br>Group Island $\beta$<br>2-way ANOVA<br>(Group, Pair) |             |

\*Method of Benjamini and Hochberg is always used for FDR calculation

**Table S3: Relative Performance of CpG Island Algorithms on COH HCT116 Dataset**

|                                   | Num of Regions | COHCAP Overlap<br>(Avg by Island) | Expression<br>Overlap       | Expression<br>Correlation     |
|-----------------------------------|----------------|-----------------------------------|-----------------------------|-------------------------------|
| <b>COHCAP<br/>(Avg by Island)</b> | 140 regions    | 125 genes<br>(100%)               | <b>48 genes<br/>(38.4%)</b> | <b>73 regions<br/>(52.1%)</b> |
| <b>COHCAP<br/>(Avg by Site)</b>   | 275 regions    | 115 genes<br>(41.8%)              | <b>32 genes<br/>(11.6%)</b> | NA                            |
|                                   |                |                                   |                             |                               |
| <b>IMA<br/>(TSS200)</b>           | 811 regions    | 70 genes<br>(8.6%)                | <b>15 genes<br/>(1.8%)</b>  | NA                            |
| <b>IMA<br/>(TSS1500)</b>          | 726 regions    | 37 genes<br>(5.1%)                | <b>70 genes<br/>(9.6%)</b>  | NA                            |
|                                   |                |                                   |                             |                               |
| <b>IMA<br/>(ISLAND)</b>           | 616 regions    | <b>93 regions<br/>(15.1%)</b>     | NA                          | NA                            |
| <b>IMA<br/>(NSHELF)</b>           | 933 regions    | 10 regions<br>(1.1%)              | NA                          | NA                            |
| <b>IMA<br/>(NSHORE)</b>           | 1,404 regions  | 48 regions<br>(3.4%)              | NA                          | NA                            |
| <b>IMA<br/>(SSHELF)</b>           | 880 regions    | 7 regions<br>(0.8%)               | NA                          | NA                            |
| <b>IMA<br/>(SSHORE)</b>           | 1,438 regions  | 44 regions<br>(3.1%)              | NA                          | NA                            |

**Table S4: Runtime for COH HCT116 Analysis (N=6)****Linux Server (Concurrent Usage, x64, CentOS Red Hat 4.1, 264 GB RAM, 6 x 2.27 GHz processors)**

|                           | <b>COHCAP<br/>(Average by Site)</b> | <b>COHCAP<br/>(Average by<br/>Island)</b> | <b>IMA</b>     | <b>methylKit</b> |
|---------------------------|-------------------------------------|-------------------------------------------|----------------|------------------|
| <b>Annotate Beta File</b> | 0:00:22                             | 0:00:22                                   | NA             | NA               |
| <b>QC Figures</b>         | 0:00:42                             | 0:00:43                                   | NA             | NA               |
| <b>Site Statistics</b>    | 0:06:26                             | 0:06:27                                   | NA             | NA               |
| <b>.wig file creation</b> | 0:00:12                             | NA                                        | NA             | NA               |
| <b>Filter Sites</b>       | 0:00:04                             | 0:00:08                                   | NA             | NA               |
| <b>Island Statistics</b>  | 0:00:18                             | 0:00:23                                   | NA             | NA               |
| <b>Integration</b>        | 0:00:01                             | 0:00:12                                   | NA             | NA               |
| <b>Total Time</b>         | <b>0:08:05</b>                      | <b>0:08:15</b>                            | <b>0:05:58</b> | <b>0:38:38</b>   |

**Local PC (Minimal Concurrent Usage, x64, Windows 7, 24 GB RAM, 2 x 3.60 GHz processors)**

|                           | <b>COHCAP<br/>(Average by Site)</b> | <b>COHCAP<br/>(Average by<br/>Island)</b> | <b>IMA</b>     | <b>methylKit</b> |
|---------------------------|-------------------------------------|-------------------------------------------|----------------|------------------|
| <b>Annotate Beta File</b> | 0:00:51                             | 0:00:57                                   | NA             | NA               |
| <b>QC Figures</b>         | 0:00:43                             | 0:00:43                                   | NA             | NA               |
| <b>Site Statistics</b>    | 0:05:58                             | 0:05:20                                   | NA             | NA               |
| <b>.wig file creation</b> | 0:00:29                             | NA                                        | NA             | NA               |
| <b>Filter Sites</b>       | 0:00:05                             | 0:00:12                                   | NA             | NA               |
| <b>Island Statistics</b>  | 0:00:14                             | 0:00:02                                   | NA             | NA               |
| <b>Integration</b>        | 0:00:01                             | 0:00:02                                   | NA             | NA               |
| <b>Total Time</b>         | <b>0:08:21</b>                      | <b>0:07:15</b>                            | <b>0:04:27</b> | <b>0:25:48</b>   |

**Local Mac (Minimal Concurrent Usage, x64, Mac OS 10.6, 4 GB RAM, 2 x 2.66 GHz processors)**

|                           | <b>COHCAP<br/>(Average by Site)</b> | <b>COHCAP<br/>(Average by<br/>Island)</b> | <b>IMA</b>     | <b>methylKit</b> |
|---------------------------|-------------------------------------|-------------------------------------------|----------------|------------------|
| <b>Annotate Beta File</b> | 0:01:53                             | 0:01:30                                   | NA             | NA               |
| <b>QC Figures</b>         | 0:01:30                             | 0:01:17                                   | NA             | NA               |
| <b>Site Statistics</b>    | 0:05:59                             | 0:05:19                                   | NA             | NA               |
| <b>.wig file creation</b> | 0:01:35                             | NA                                        | NA             | NA               |
| <b>Filter Sites</b>       | 0:00:27                             | 0:00:39                                   | NA             | NA               |
| <b>Island Statistics</b>  | 0:00:30                             | 0:00:02                                   | NA             | NA               |
| <b>Integration</b>        | 0:00:01                             | 0:00:02                                   | NA             | NA               |
| <b>Total Time</b>         | <b>0:11:55</b>                      | <b>0:08:49</b>                            | <b>0:10:34</b> | <b>0:35:05</b>   |



**Table S5: “Average by Site” CpG Island Statistics for Validation Genes**

| Gene   | Region                    | # Methyl | # Unmethyl | P-Value | FDR     |
|--------|---------------------------|----------|------------|---------|---------|
| RAB34  | chr17:27044168-27045049   | 0        | 7          | 1.8e-11 | 1.6e-9  |
|        | chr17:27046856-27047273   | 0        | 4          | 4.8e-6  | 0.00012 |
| NEDD4L | chr18:55862653-55862873   | 8        | 0          | 5.5e-12 | 5.8e-10 |
| TCF7L2 | chr10:114712115-114712544 | 4        | 0          | 4.6e-6  | 1.2e-4  |
| VSNL1  | chr2:17721537-17722021    | 7        | 0          | 3.7e-15 | 7.8e-13 |

“#Methyl” and “# Unmethyl” describe the number of CpG shows showing relative hyper- or hypo-methylation (respectively) between the mutant and parental HCT116 strains. Although two regions are listed for RAB34, they both corresponded to nearby UCSC CpG islands (with a single optimized coordinate of chr17:27,440,000-27,045,500). Likewise, validation for NEDD4L used an optimized coordinate of chr18:55,862,550-55,862,900 and TCF7L2 used the optimized coordinate of chr10:114,712,000-114,713,500. Visual inspection of the VSNL1 CpG island indicated that the original UCSC coordinates were sufficient. In general, visual inspection is necessary because the CpG shores are included in the CpG island mappings and the overall range will not provide the most precise location of the differentially methylated CpG sites. Genome coordinates are specified with respect to hg19.

**Table S6: Relative Performance of COHCAP Workflows on TCGA Methylation Data****A. Comparison of COHCAP Workflows**

|                    | Avg by Site<br>Patient IDs<br>Paired | Avg by Site<br>Patient IDs<br>All | Avg by Site<br>All<br>All | Avg by Island<br>Patient IDs<br>Paired | Avg by Island<br>Patient IDs<br>All | Avg by Island<br>All<br>All |
|--------------------|--------------------------------------|-----------------------------------|---------------------------|----------------------------------------|-------------------------------------|-----------------------------|
| <b>CpG Site</b>    | 21,089 sites                         | 20,935 sites                      | 0 sites                   | 11,973 sites                           | 11,544 sites                        | 0 sites                     |
| <b>CpG Island</b>  | 1,602 regions                        | 1,298 regions                     | NA                        | 1,289 regions                          | 1,145 regions                       | NA                          |
| <b>Integration</b> | 177 regions                          | 150 regions                       | NA                        | 252 regions                            | 221 regions                         | NA                          |

**B. Comparison with IMA (Patient IDs, Paired Samples)**

|                                   | Num of Regions | COHCAP Overlap                  | Expression<br>Overlap         | Expression<br>Correlation      |
|-----------------------------------|----------------|---------------------------------|-------------------------------|--------------------------------|
| <b>COHCAP<br/>(Avg by Island)</b> | 1,289 regions  | 880 genes<br>(100%)             | <b>186 genes<br/>(21.1%)</b>  | <b>466 regions<br/>(36.2%)</b> |
| <b>IMA<br/>(TSS200)</b>           | 6232 genes     | 201 genes<br>(3.2%)             | <b>1512 genes<br/>(24.2%)</b> | NA                             |
| <b>IMA<br/>(TSS1500)</b>          | 8170 genes     | 214 genes<br>(2.6%)             | <b>2053 genes<br/>(25.1%)</b> | NA                             |
| <b>IMA<br/>(ISLAND)</b>           | 12051 regions  | <b>1259 regions<br/>(10.4%)</b> | NA                            | NA                             |

CpG site analysis is identical for either workflow, but site counts vary because the “Average by Island” workflow includes a minimum number of sites per island in this early filtering step (but this is not considered until the integration step for the “Average by Site” workflow). “Patient IDs” means 2-way ANOVA takes tumor vs. normal patient pairing consideration. “Paired” means only samples with paired tumor and normal data were included (N=134). “All” means all possible samples were included (N=562). Analysis was performed with methylated / unmethylated beta values = 0.3; p-value cutoff = FDR cutoff = 0.05; Minimum number of sites per island= 4; fold-change cutoff=1.5; correlation coefficient cutoff = -0.2. Although the sample size varies by ~4x, the number of regions identified is very similar with paired vs. all samples.

**Table S7: Runtime for TCGA Analysis****A. Paired Samples, N=134**

|                           | <b>COHCAP<br/>(Average by Site)</b> | <b>COHCAP<br/>(Average by<br/>Island)</b> | <b>IMA</b>     |
|---------------------------|-------------------------------------|-------------------------------------------|----------------|
| <b>Annotate Beta File</b> | 0:04:35                             | 0:06:45                                   | NA             |
| <b>QC Figures</b>         | 5:18:30                             | 5:55:55                                   | NA             |
| <b>Site Statistics</b>    | 6:41:20                             | 6:13:03                                   | NA             |
| <b>.wig file creation</b> | 0:00:12                             | NA                                        | NA             |
| <b>Filter Sites</b>       | 0:00:04                             | 0:02:57                                   | NA             |
| <b>Island Statistics</b>  | 0:02:43                             | 0:11:37                                   | NA             |
| <b>Integration</b>        | 0:00:57                             | 0:02:18                                   | NA             |
| <b>Total Time</b>         | <b>12:08:21</b>                     | <b>12:32:35</b>                           | <b>0:18:50</b> |

**B. All Samples, N=562**

|                           | <b>COHCAP<br/>(Average by Site)</b> | <b>COHCAP<br/>(Average by<br/>Island)</b> | <b>IMA</b>     |
|---------------------------|-------------------------------------|-------------------------------------------|----------------|
| <b>Annotate Beta File</b> | 0:31:18                             | 0:06:18                                   | NA             |
| <b>QC Figures</b>         | 11:18:09                            | 11:31:52                                  | NA             |
| <b>Site Statistics</b>    | 25:35:41                            | 24:04:06                                  | NA             |
| <b>.wig file creation</b> | 0:00:13                             | NA                                        | NA             |
| <b>Filter Sites</b>       | 0:00:04                             | 0:02:57                                   | NA             |
| <b>Island Statistics</b>  | 0:02:14                             | 0:14:54                                   | NA             |
| <b>Integration</b>        | 0:01:00                             | 0:03:05                                   | NA             |
| <b>Total Time</b>         | <b>37:28:39</b>                     | <b>36:03:12</b>                           | <b>1:06:43</b> |

Analysis was performed on a Linux Server (Concurrent Usage, x64, CentOS Red Hat 4.1, 264 GB RAM, 6 x 2.27 GHz processors). COHCAP and IMA both caused the less powerful local computers (either PC or Mac) to crash.

**Table S8: Differentially Methylated Breast Cancer Biomarkers with Inverse Changes in Gene Expression**

| Gene          | Methylation Status           | Biomarker Application(s)                                  | Identified with IMA?                                                                         |
|---------------|------------------------------|-----------------------------------------------------------|----------------------------------------------------------------------------------------------|
| ESR1          | Decrease (-0.17)             | Diagnosis<br>Disease Progression<br>Efficacy<br>Prognosis | EXON1 (0.08)                                                                                 |
| GATA3         | Decrease (-0.08)             | Diagnosis                                                 | EXON1 (0.12)<br>TSS200 (0.059)                                                               |
| C2orf40/ECRG4 | <b>Increase (0.27)</b>       | Disease Progression                                       | <b>GENEBODY (0.071)</b><br>TSS200 (-0.032)                                                   |
| CCND2         | <b>Increase (0.26, 0.31)</b> | Efficacy                                                  | GENEBODY (-0.044)<br><b>TSS200 (0.026)</b>                                                   |
| GLI2          | <b>Increase (0.34)</b>       | Efficacy                                                  | <b>EXON1 (0.043)</b><br><b>GENEBODY (0.020)</b><br><b>TSS200 (0.043)</b><br>TSS1500 (-0.040) |
| GSTM2         | <b>Increase (0.20)</b>       | Diagnosis<br>Prognosis                                    | GENEBODY (-0.11)<br><b>TSS1500 (0.11)</b>                                                    |
| IGFBP3        | <b>Increase (0.15)</b>       | Diagnosis<br>Efficacy                                     | <b>EXON1 (0.072)</b><br><b>GENEBODY (0.030)</b><br><b>TSS1500 (0.12)</b>                     |
| LAMP3         | <b>Increase (0.17)</b>       | Diagnosis                                                 | <b>TSS1500 (0.076)</b>                                                                       |
| PDPN          | Increase (0.29)              | Diagnosis                                                 | [None]                                                                                       |
| PROM1         | <b>Increase (0.25)</b>       | Efficacy                                                  | <b>EXON1 (0.10)</b><br><b>TSS1500 (0.048)</b>                                                |
| PTGS2         | Increase (0.25)              | Diagnosis<br>Efficacy<br>Prognosis                        | [None]                                                                                       |
| SFRP1         | <b>Increase (0.19)</b>       | Prognosis                                                 | <b>TSS1500 (0.026)</b>                                                                       |

\*Only TSS200, TSS1500, EXON1, and GENEBODY IMA regions have mappings to genes are considered in the “Identified with IMA?” column. Delta beta values are shown in parentheses (to check concordance of methylation change). Genes with similar trends are shown in bold. IGFBP3 and GSTM2 are shown in red because they are the only genes with roughly corresponding magnitude of change and location of CpG Island.

**Table S9: Selected IMA Breast Cancer Biomarkers with Inverse Overlap in Gene Expression**

| Gene     | Methylation Status     | Biomarker Application(s)      | Identified with COHCAP? |
|----------|------------------------|-------------------------------|-------------------------|
| BIRC5    | Decrease (-0.07)       | Disease Progression Prognosis | No                      |
| BRCA1    | Decrease (-0.01)       | Disease Progression Prognosis | No                      |
| BRCA2    | Decrease (-0.09)       | Disease Progression Prognosis | No                      |
| CD44     | Decrease (-0.03)       | Disease Progression Prognosis | No                      |
| ENAH     | Decrease (-0.02)       | Disease Progression           | No                      |
| FOXA1    | Decrease (-0.07)       | Disease Progression Prognosis | No                      |
| PCGF2    | Decrease (-0.07)       | Prognosis                     | No                      |
| RPS6KB2  | Decrease (-0.17)       | Prognosis                     | No                      |
| SLC2A1   | Decrease (-0.08)       | Prognosis                     | No                      |
| ALDH1A1  | Increase (0.47)        | Disease Progression Prognosis | No                      |
| APC      | Increase (0.08)        | Disease Progression Prognosis | No                      |
| ARHGAP19 | Increase (0.06)        | Disease Progression           | No                      |
| CEBPA    | Increase (0.06)        | Disease Progression Prognosis | No                      |
| CRMP1    | <b>Increase (0.04)</b> | Disease Progression           | <b>Yes (0.28)</b>       |
| DPYD     | Increase (0.10)        | Disease Progression Prognosis | No                      |
| ENG      | Increase (0.07)        | Disease Progression Prognosis | No                      |
| ESR2     | Increase (0.06)        | Disease Progression Prognosis | No                      |
| FERMT2   | Increase (0.09)        | Prognosis                     | No                      |
| GSTM2    | <b>Increase (0.11)</b> | Prognosis                     | <b>Yes (0.20)</b>       |
| GSTM5    | Increase (0.05)        | Prognosis                     | No                      |
| PXN      | Increase (0.03)        | Prognosis                     | No                      |

IMA statistics for TSS1500 regions are considered for this analysis, and delta beta values are shown in parentheses. IMA identified 33 biomarkers with decreased methylation and increased expression and 22 biomarkers with increased methylation and decreased expression. The subset of genes associated with disease progression and prognosis (instead of disease progression, diagnosis, efficacy, prognosis, or response to therapy) are shown in the table above. A total of 2039 genes (2.7% known biomarkers) were considered for IMA biomarker analysis while 247 genes were considered for COHCAP biomarker analysis (4.9% known biomarkers).

**Table S10: Previously Reported Breast Cancer Biomarkers Influenced by Gene Expression**

| Gene          | Delta Beta | Methylation P-value   | Correlation Coefficient | Correlation P-value   | Previous Publication      | IPA Biomarker? |
|---------------|------------|-----------------------|-------------------------|-----------------------|---------------------------|----------------|
| ESR1          | -0.17      | $1.4 \times 10^{-18}$ | -0.36                   | $2.4 \times 10^{-17}$ | Sproul et al. 2011 [44]   | Yes            |
| C2orf40/ECRG4 | 0.27       | $2.4 \times 10^{-19}$ | -0.32                   | $5.5 \times 10^{-15}$ | Sabatier et al. 2011 [62] | Yes            |
| CCND2         | 0.29       | $5.8 \times 10^{-21}$ | -0.21                   | $4.3 \times 10^{-6}$  | How Kit et al. 2012 [63]  | Yes            |
| PCDH10        | 0.22       | $1.7 \times 10^{-16}$ | -0.08                   | 0.047                 | Faryna et al. 2012 [64]   | No             |
| POU4F1        | 0.29       | $2.2 \times 10^{-22}$ | -0.13                   | 0.0025                | Faryna et al. 2012 [64]   | No             |
| SIM1          | 0.33       | $2.1 \times 10^{-23}$ | -0.10                   | 0.024                 | Faryna et al. 2012 [64]   | No             |
| TAC1          | -0.32      | $1.7 \times 10^{-21}$ | -0.11                   | 0.0098                | Faryna et al. 2012 [64]   | No             |

CCND1 averaged between multiple CpG islands that map to the same gene.

**Table S11: Top 10 COHCAP 450k Methylated CpG Islands for MIRA Comparison****A. CpG Island Analysis**

| COHCAP CpG Island         | Gene        | MIRA Peak? | 3 x 720k Coverage? |
|---------------------------|-------------|------------|--------------------|
| chr6:31856896-31857104    | EHMT2       | Yes        | Yes                |
| chr6:31856896-31857104    | BAT2        | Yes        | Yes                |
| chr6:32063533-32065044    | TNXB        | Yes        | Yes                |
| chr6:32134460-32135196    | PPT2        | Yes        | Yes                |
| chr6:32046815-32047094    | TNXB        | Yes        | Yes                |
| chr6:31691425-31691718    | LY6G6C      | Yes        | Yes                |
| chr14:101531643-101532384 | MIR377      | Yes        | Yes                |
| chr6:32729342-32729877    | HLA-DQB2    | Yes        | Yes                |
| chr6:33288733-33289008    | ZBTB22;DAXX | Yes        | Yes                |
| chr16:89345463-89348521   | ANKRD11     | Yes        | Yes                |

**B. CpG Site Analysis**

| Probe      | COHCAP CpG Island         | Gene                  | MIRA Peak? | 3 x 720k Coverage? |
|------------|---------------------------|-----------------------|------------|--------------------|
| cg20741134 | chr1:181382290-181382848  | NA                    | No         | No                 |
| cg14377739 | chr9:139701953-139703088  | KIAA1984;LOC100131193 | No         | Yes                |
| cg15027907 | chr19:48076461-48076877   | NA                    | No         | Yes                |
| cg12028762 | chr19:3500416-3500840     | DOHH                  | No         | Yes                |
| cg14462432 | chr9:127572126-127572641  | OLFML2A               | Yes        | Yes                |
| cg19968916 | chr10:135089969-135090491 | ADAM8                 | No         | Yes                |
| cg06535952 | chr19:56125349-56128167   | NA                    | No         | No                 |
| cg00710721 | chr16:1179618-1179942     | NA                    | No         | Yes                |
| cg17279652 | chr5:180622178-180622658  | TRIM7                 | Yes        | Yes                |
| cg24161106 | chr17:17715696-17716219   | MIR33B;SREBF1         | No         | Yes                |

**Table S12: Runtime for Single-Group Analysis**

|                    | Linux Server       | Local PC       | Local Mac      |
|--------------------|--------------------|----------------|----------------|
| OS                 | CentOS Red Hat 4.1 | Windows 7      | Mac OS 10.6    |
| RAM                | 264 GB             | 24 GB          | 4 GB RAM       |
| Processors         | 6 x 2.27 GHz       | 2 x 3.60 GHz   | 2 x 2.66 GHz   |
|                    |                    |                |                |
| Annotate Beta File | 0:00:24            | 0:00:49        | 0:01:44        |
| QC Figures         | 0:00:43            | 0:00:44        | 0:01:17        |
| Site Statistics    | 0:01:06            | 0:02:23        | 0:01:40        |
| .wig file creation | 0:00:04            | 0:00:09        | 0:00:20        |
| Filter Sites       | 0:00:05            | 0:00:20        | 0:00:30        |
| Island Statistics  | 4:41:00            | 3:13:48        | 5:01:42        |
| <b>Total Time</b>  | <b>4:43:22</b>     | <b>3:18:13</b> | <b>5:07:13</b> |

The HCT116 data produced for this study was used for all of these benchmarks. The “Average by Site” algorithm was used in COHCAP. The Linux server had normal concurrent usage but the local machines had minimal concurrent usage.



**Table S13: Simulated Overlap of COHCAP CpG Islands in BS-Seq Data using methylKit**

| <b>Simulation</b>                                      | <b>COHCAP Recovery</b> | <b># of methylKit Regions</b> |
|--------------------------------------------------------|------------------------|-------------------------------|
| 100x Coverage                                          | 139 / 140 (99.3%)      | 221 / 14,449 windows          |
| 10x Coverage                                           | 138 / 140 (98.6%)      | 220 / 12,174 windows          |
| 5x Coverage                                            | 138 / 140 (98.6%)      | 213 / 8,940 windows           |
| <b>Vary Coverage per Site</b>                          |                        |                               |
| 10x±5x Coverage                                        | 140 / 140 (100%)       | 218 / 11,843 windows          |
| <b>Conservative Windows (methylKit FDR &lt; 0.001)</b> |                        |                               |
| 10x Coverage                                           | 137 / 140 (97.6%)      | 215 / 7,290 windows           |
| 5x Coverage                                            | 133 / 140 (95.0%)      | 193 / 2,803 windows           |
| <b>Conservative Windows (methylKit FDR &lt; 1e-6)</b>  |                        |                               |
| 10x Coverage                                           | 134 / 140 (95.7%)      | 199 / 3,236 windows           |
| 5x Coverage                                            | 126 / 140 (90%)        | 159 / 800 windows             |
| <b>Conservative Windows (methylKit FDR &lt; 1e-10)</b> |                        |                               |
| 10x Coverage                                           | 129 / 140 (92.1%)      | 172 / 1,118 windows           |
| 5x Coverage                                            | 114 / 140 (81.4%)      | 130 / 369 windows             |

In most cases, methylKit regions are defined using as showing at least a 30% methylation difference and an FDR < 0.05, except for the “conservative windows” which are filtered for a much lower FDR (to see if COHCAP regions ranked highly in the list of methylKit regions).
